# 1 **Projected climate change will reduce habitat suitability for** 2 **bumble bees in the Pacific Northwest**

3  
4 Jonathan B. Koch<sup>1,2,#a,\*</sup>, Chris Looney<sup>3</sup>, Brandon Hopkins<sup>4</sup>, Elinor M. Lichtenberg<sup>5</sup>, Walter S.  
5 Sheppard<sup>4</sup>, James P. Strange<sup>2</sup>

6  
7 <sup>1</sup>Department of Biology & Ecology Center, Utah State University, 5305 Old Main Hill, Logan,  
8 Utah, 84322

9 <sup>2</sup>United States Department of Agriculture-Agricultural Research Services, Pollinating Insects-  
10 Biology, Management, and Systematics Research Laboratory, 5305 Old Main Hill, Logan, Utah,  
11 84322

12 <sup>3</sup>Plant Protection Division, Washington State Department of Agriculture, Olympia, WA 98504

13 <sup>4</sup>Department of Entomology, Washington State University, Pullman, WA 99164

14 <sup>5</sup>Department of Integrative Biology, The University of Texas at Austin, Austin, TX 78712

15 <sup>#a</sup>Current Address: Department of Biology & Tropical Conservation Biology and Environmental  
16 Science Graduate Program, University of Hawaii at Hilo, 200 W. Kawili Street, Hilo, Hawaii,  
17 96720

18 \* Corresponding author

19 Email: [kochj@hawaii.edu](mailto:kochj@hawaii.edu) (JBK)

## 20 21 **Abstract**

22 Global climate change is the greatest environmental challenge of the modern era. The impacts of  
23 climate change are increasingly well understood, and have already begun to materialize across  
24 diverse ecosystems and organisms. Bumble bees (*Bombus*) are suspected to be highly sensitive to  
25 climate change as they are predominately adapted to temperate and alpine environments. In this  
26 study, we determine which bumble bee species are most vulnerable to climate change in the  
27 Pacific Northwest. The Pacific Northwest is a topographically complex landscape that is  
28 punctuated by two major mountain ranges and a labyrinth of offshore islands in the Salish Sea.  
29 Using standardized survey methods, our study documents the occurrence of 15 bumble bee  
30 species across 23 field sites in seven federal parks, historical sites, and monuments. Our results

31 show that bumble bee community richness and diversity increases along an altitude gradient in  
32 these protected areas. Furthermore, NMDS analysis reveals that high altitude environments are  
33 composed of a unique group of bumble bee species relative to low altitude environments.  
34 Finally, based on an analysis of species distributions models that aggregate bioclimatic data from  
35 global circulation climate models with preserved specimen records, we discover that 80% of the  
36 bumble bee species detected in our survey are poised to undergo habitat suitability (HS) loss  
37 within the next 50 years. Species primarily found in high altitude environments namely *B.*  
38 *vandykei*, *B. sylvicola*, and *B. bifarius* are projected to incur a mean HS loss of 63%, 59%, and  
39 30% within the federally protected areas, respectively. While the implementation of climate  
40 change policies continue to be a significant challenge, the development of mitigation strategies to  
41 conserve the most vulnerable species may be a tractable option for land managers and  
42 stakeholders of protected areas. Our study meets this need by identifying which species and  
43 communities are most sensitive to climate change.

44

## 45 **Introduction**

46 Pollinator communities worldwide are undergoing dramatic changes in both abundance  
47 and composition that may put pollination service at risk in many terrestrial ecosystems [1]. These  
48 changes may not solely be unidirectional declines in species abundance, but can manifest as  
49 shifts in geographic range, increases in abundance where new habitat is formed, or shifts in  
50 phenology [2–4]. To date, documented changes in pollinator communities have been attributed to  
51 many factors, including pathogen outbreaks, pesticides, climate change, introduced species, and  
52 land-use change [4–9]. Identifying the factors affecting pollinator communities can be  
53 challenging as most strategies investigate distinct taxonomic groups (guilds) [10], or attempt to  
54 isolate specific threats and measure a single species' responses to the threat in question [2–4,11].  
55 However, given the negative impacts of rapid global change [1,5], it is imperative to identify  
56 which pollinator species out of a guild might be most vulnerable to a specific environmental  
57 impact. Identifying the most at-risk or vulnerable species within a guild might allow for a more  
58 effective approach to management and threat mitigation [12,13].

59 In montane regions, some pollinators are predicted to follow plant distributional shifts up  
60 slope as climates warm [14,15], but where species are already restricted to high altitude habitat it  
61 is unclear if they can adapt *in situ* [16–18]. Climate change is an emerging threat to pollinators,

62 yet it remains poorly studied because isolating the effects of climate from other potential factors  
63 is difficult [4,19]. There is a global consensus among scientists that the economic activities  
64 associated with human population growth have significantly influenced climate patterns by  
65 increasing greenhouse gas emissions, namely carbon dioxide (CO<sub>2</sub>), methane (CH<sub>4</sub>), and nitrous  
66 oxide (N<sub>2</sub>O) since the industrial revolution [20]. Bee phenology derived from museum records  
67 already demonstrates earlier springtime activity of bees in the northeastern US, correlated with  
68 climate warming over the past century [4]. Furthermore, the reduction of suitable habitat due to  
69 climate change is suspected to shift bumble bee distributions upslope [15], a phenomenon  
70 observed in diversity of organisms [17,18]. Miller-Struttman et al. [16] found that alpine  
71 bumble bee species have experienced rapid evolutionary change in the length of their proboscis  
72 due to the decline of floral resources in montane regions in Colorado. Studies like Miller-  
73 Struttman et al. thereby suggest that species that are adapted to alpine environments might be  
74 exposed to greater evolutionary pressures in the next 50 years due to climate change [17,21–24].  
75 Under currently projected climate models, bumble bee distributions are predicted to shift to  
76 higher latitudes in the cases where habitat suitability gains in altitude are limited [2,3,8].

77 Bumble bees (*Bombus*) are a predominantly temperate-adapted genus of primitively  
78 eusocial bee (Hymenoptera: Apidae) that are dependent on a variety of floral resources for pollen  
79 and nectar [5]. There are more than 250 different bumble bee species worldwide, 30 of which are  
80 distributed in the western US [25,26]. They are important pollinators of wild flowering plants  
81 especially in montane and alpine environments. The US Pacific Northwest is rich in wildflower  
82 and bumble bee diversity, largely in part to the environmental heterogeneity resulting from the  
83 region's complex topography [26,27]. The topography of the Pacific Northwest is hypothesized  
84 to have significantly influenced patterns of population genetic diversity [27,28], with some  
85 protected mountain and island regions lending themselves to uncommon phenotypes of certain  
86 bumble bee species [29,30]. In the Pacific Northwest *B. occidentalis* is known to be at risk for  
87 decline due to pathogens, while *B. vosnesenskii*, may be expanding in range [10,31]. Several  
88 other species are also suspected of undergoing changes in range or abundance in the region, yet  
89 empirical data is currently lacking [10,32,33]. While a high richness of bumble bee species is  
90 found in the Pacific Northwest [26], they are threatened by the effects of projected climate  
91 change in the region. It is estimated that over the next century, the region will incur rates of

92 warming by up to 1°C per decade and a 1–2% increase in annual precipitation, likely facilitating  
93 wetter autumns and drier summers and winters [34].

94         There is a critical need to estimate the effects of projected climate change on bumble bee  
95 communities in the Pacific Northwest. While domestic and international policy will be the key  
96 factor in mitigating the effects of climate change, managers of protected areas in the US may  
97 begin to develop management and prioritization strategies for species that are most vulnerable to  
98 the effects of climate change [12,35]. The US National Parks found in the Pacific Northwest are  
99 situated across an altitude gradient that allows for an investigation on community composition  
100 and turnover of bumble bee pollinators and an assessment of the impacts of projected climate  
101 change on bumble bee habitat suitability. In this study, we aim to answer the following  
102 questions: 1) What is the relationship between species diversity/richness across an altitude  
103 gradient? 2) Is bumble bee community composition predicted by their distribution across an  
104 altitude gradient? And 3) Which species will experience significant gains/losses in habitat  
105 suitability in the Pacific Northwest national parks based on projected climate change scenarios?  
106 To answer these questions, we surveyed bumble bee communities to estimate species richness  
107 and diversity. We then constructed species distribution models (SDMs) to estimate habitat  
108 suitability (HS) for the bumble bees distributed in the region by combining georeferenced  
109 museum records with bioclimatic data. Finally, we projected the SDMs to future climate  
110 scenarios to estimate HS change. Characterizing bumble bee community composition and  
111 projecting HS change in the Pacific Northwest will provide park management with information  
112 on which bumble bee communities and species are most vulnerable to climate change.

## 113 **Materials and Methods**

### 114 *Field Survey*

115         In the summers of 2013 and 2014 we visited 23 field sites in seven US National Parks in  
116 the Pacific Northwest to survey bumble bees (Fig 1; Table 1). In Olympic National Park  
117 (OLYM) and Mount Rainier National Park, two transects were surveyed across an altitude  
118 gradient, while North Cascades National Park (NOCA) had one transect surveyed. In Ebey's  
119 Landing National Historical Reserve (EBLA), Lewis and Clark National Historical Park (LEWI),  
120 and Fort Vancouver National Historic Site (FOVA) one site at each park was surveyed. In San  
121 Juan Islands National Historical Park (SAJH), two sites were surveyed. We did not survey

122 bumble bees across an altitude gradient in EBLA, LEWI, FOVA, and SAJH as they are near sea  
123 level. In NOCA and OLYM, we revisited some sites surveyed in a previous study [10].

124

125 **Fig 1. Distribution of field sites surveyed for bumble bees across and adjacent to US**  
126 **National Parks in the Pacific Northwest.** National Parks are demarcated by large green  
127 polygons, and field sites are demarcated by dark blue points. OLYM=Olympic National Park,  
128 MORA=Mount Rainier National Park, NOCA=North Cascades National Park, EBLA=Ebey's  
129 Landing National Historical Reserve, LEWI=Lewis and Clark National Historical Park, FOVA=  
130 Fort Vancouver National Historic Site, SAJH= San Juan Islands National Historical Park.

131

132 **Table 1. Bumble bee field sites and abundances across and adjacent to US National Parks**  
133 **in the Pacific Northwest.**

134

| Site                 | Altitude<br>(m) | National<br>Park  | Latitude | Longitude | Abundance |
|----------------------|-----------------|-------------------|----------|-----------|-----------|
| Ebey's Landing       | 20              | Ebey's<br>Landing | 48.1933  | -122.7096 | 35        |
| Fort Vancouver       | 12              | Fort<br>Vancouver | 45.6236  | -122.6615 | 55        |
| Lewis & Clark NP     | 2               | Lewis &<br>Clark  | 46.1175  | -123.8752 | 33        |
| Lower Palisades Lake | 1804            | Mt. Rainier       | 46.9542  | -121.5924 | 5         |
| near Sunrise Meadows | 1907            | Mt. Rainier       | 46.9136  | -121.6222 | 8         |
| Paradise Meadows     | 1603            | Mt. Rainier       | 46.7863  | -121.7399 | 48        |
| Snow Lake            | 1458            | Mt. Rainier       | 46.7655  | -121.7057 | 44        |
| Upper Crystal Lake   | 1784            | Mt. Rainier       | 46.9057  | -121.5094 | 53        |
| Upper Palisades Lake | 1804            | Mt. Rainier       | 46.9493  | -121.5923 | 30        |
| West Side Road       | 878             | Mt. Rainier       | 46.7794  | -121.8847 | 50        |

|                                |      |                    |         |           |    |
|--------------------------------|------|--------------------|---------|-----------|----|
| Sahale Arm Trail               | 1875 | North<br>Cascade   | 48.4713 | -121.5188 | 44 |
| Sibley Creek                   | 419  | North<br>Cascade   | 48.5122 | -121.2507 | 36 |
| Cascade Pass                   | 1638 | North<br>Cascades  | 48.468  | -121.0596 | 38 |
| Crescent Lake, East Beach      | 209  | Olympic            | 48.086  | -123.7429 | 17 |
| Heart Lake                     | 1460 | Olympic            | 47.9109 | -123.733  | 28 |
| Lower Bridge Creek<br>Campsite | 1163 | Olympic            | 47.9241 | -123.7334 | 42 |
| Lower Royal Basin              | 1421 | Olympic            | 47.8391 | -123.2113 | 41 |
| Royal Basin Parking Lot        | 1170 | Olympic            | 47.8776 | -123.0039 | 5  |
| Royal Basin Ranger Station     | 1564 | Olympic            | 47.8331 | -123.2112 | 25 |
| Royal Basin Trail              | 1177 | Olympic            | 47.8592 | -123.2028 | 2  |
| Sandpoint Loop                 | 12   | Olympic            | 48.1544 | -124.69   | 13 |
| American Camp                  | 38   | San Juan<br>Island | 48.4612 | -123.0221 | 61 |
| English Camp                   | 1    | San Juan<br>Island | 48.5862 | -123.1502 | 60 |

135

136

137 Sites were surveyed by teams of individuals using standardized net collections of bumble  
 138 bees at plots of approximately 0.5 ha. Sites varied in floral density and accessibility for off trail  
 139 movement. To standardize sampling effort, surveys were timed and collections were numerically  
 140 synchronized to 1.5 collector hours per site when feasible. Collectors surveyed with  
 141 entomological nets (30 cm diameter) and collected bumble bees foraging on flowers directly into  
 142 20 mL plastic vials. The vials were placed on ice for 10-15 minutes until surveys were complete

143 and the bees were immobilized by the cold. Upon completion of the survey period, the bumble  
144 bees were sexed and preliminarily identified to species using regional field guides [26,36]. While  
145 the specimens were immobilized, we non-lethally sampled DNA from the bumble bees by  
146 removing a mid-leg from each individual [27]. The mid-legs were individually stored in 95%  
147 ethanol for DNA analysis to verify the species identity. At each site, a worker and male of each  
148 captured species were sacrificed and retained as voucher specimens. All queens were released  
149 after legs were sampled.

150 During the survey period we recorded floral hosts to each specimen and collected  
151 pertinent environmental data from each site. Each survey event was assigned a unique locality  
152 description and georeferenced with a Garmin GPSmap 60CS. We recorded temperature (°C),  
153 relative humidity (%), and wind speed (kph) data with a Kestrel 4000 Pocket Weather Tracker.  
154 Voucher specimens were pinned and assigned a unique barcode ID, and curated into the USDA-  
155 ARS National Pollinating Insect Collection (NPIC) in Logan, UT (Table S2). Genotyped  
156 individuals were given a unique ID, an NPS accession number, and included in the NPIC  
157 database. The data is stored digitally in a relational database at the NPIC, and is also readily  
158 available on the National Park Research Permit and Reporting System website  
159 (<https://irma.nps.gov/rprs/IAR/Profile/103061>).

## 160 ***Community analysis***

161 We estimated species richness and diversity across the bumble bee communities using  
162 individual-based rarefaction. Species diversity was estimated with the inverse Simpson's D index  
163 (1/D). We tested for a correlation among species richness, diversity, and altitude with a  
164 Spearman Rank-Order Correlation test. Because of unequal sample size across field sites, we  
165 used rarefaction to estimated species richness and diversity [37]. However, we first removed four  
166 field sites from the rarefaction analysis as we detected less than 10 bumble bee individuals from  
167 the survey attempt. The remaining 19 field sites were rarefied to  $n = 10$  with the function  
168 *rarefy()*. Pairwise community dissimilarity was examined using the Bray-Curtis index in a non-  
169 metric dimensional scaling (NMDS) analysis. We then used the function *envfit()* to fit the  
170 altitude variable to the ordination results from the NMDS analysis, with 999 permutations.  
171 Projecting the ordination points onto the altitude variable (*i.e.*, environmental vector) allows us  
172 to test for a correlation between the two values. Rarefaction, NMDS, and the *envfit()* function are  
173 available in the vegan 2.5.3 library in R [38].

## 174 *Species distribution modelling*

175 We queried the Global Biodiversity Information Facility website (GBIF) (<http://gbif.org>)  
176 for bumble bee specimen records to be used in constructing SDMs. We limited our query to only  
177 include records that were “Preserved Specimens” to maximize the probability that the specimens  
178 were identified using a taxonomic key or a voucher collection. To estimate habitat suitability  
179 (HS), SDMs were constructed under the principle of maximum entropy with MaxEnt v3.4.0  
180 [39,40]. The algorithm in MaxEnt uses presence-only georeferenced spatial data and random  
181 background points sampled from the study extent to estimate the distribution of the species that  
182 is closest to uniform (=maximum entropy) under the suite of independent variables (*i.e.*,  
183 bioclimatic variables) supplied to the model [41]. HS is constrained between 0 and 1, where  
184 values closer to 0 represent low HS for the target bumble bee species, and values closer to 1  
185 represent high HS for the target bumble bee species. Specifically, HS is a measure of how  
186 suitable an area unit is based on the known distribution (specimen occurrence record) of the  
187 target species and supplied bioclimatic variables.

188 We approximated HS for 15 bumble bee species distributed in the parks by aggregating  
189 occurrence records with a suite of 19 bioclimatic variables representing contemporary conditions  
190 (1950-2000) from the WorldClim v1.4 Bioclim database. The bioclimatic variables investigated  
191 included: BIO1 = annual mean temperature, BIO2 = mean diurnal range (mean of monthly  
192 (maximum temp - minimum temp)), BIO3 = isothermality (BIO2/BIO7) (\* 100), BIO4 =  
193 temperature seasonality (standard deviation \*100), BIO5 = maximum temperature of warmest  
194 month, BIO6 = minimum temperature of coldest month, BIO7 = temperature annual range  
195 (BIO5-BIO6), BIO8 = mean temperature of wettest quarter, BIO9 = mean temperature of driest  
196 quarter, BIO10 = mean temperature of warmest quarter, BIO11 = mean temperature of coldest  
197 quarter, BIO12 = annual precipitation, BIO13 = precipitation of wettest month, BIO14 =  
198 precipitation of driest month, BIO15 = precipitation seasonality (coefficient of variation), BIO16  
199 = precipitation of wettest quarter, BIO17 = precipitation of driest quarter, BIO18 = precipitation  
200 of warmest quarter, BIO19 = precipitation of coldest quarter. Bioclimatic variables were  
201 downloaded at a spatial resolution of 2.5 arc minutes (~5 km<sup>2</sup>) and clipped to the spatial extent of  
202 the western US (Northernmost latitude: 49 Southernmost latitude: 30, Easternmost longitude: -  
203 100, Westernmost longitude: -125; Geographic Projection: WGS1984) (<http://worldclim.org>)  
204 [42].



205 To reduce model complexity, we examined the relationship between the 19 continuous  
206 bioclimatic variables with a pairwise Pearson correlation coefficient ( $r$ ) test across all 15 species.  
207 From each pairwise correlation coefficient estimate, we randomly retained only one variable for  
208 the final model if  $r \geq 0.80$ . If more than two specimen records fell within a raster pixel of the  
209 bioclimatic data, only one specimen record was retained for the final SDM. With MaxEnt, we  
210 constructed the SDMs using the default parameters of the program to generate a complementary  
211 log-log transformation (cloglog) to produce an estimate of habitat suitability averaged over 100  
212 replicates with a subsampling scheme to evaluate model performance (75% train, 25% test) [40].  
213 Models were evaluated with the area under the curve statistic (AUC). Values of AUC of 0.5  
214 connote performance no better than random, and values  $< 0.5$  worse than random. Thus, AUC  $>$   
215 0.5 is the cutoff for “good” models [39]. Each variable was evaluated for its relative importance  
216 to each species’ SDM by estimating percent contribution. In each iteration of the training  
217 algorithm, the increase in regularized gain is added to the contribution of the corresponding  
218 variable. Conversely, the regularized training gain is subtracted from the contribution of the  
219 corresponding variable if the change to the absolute value of lambda is negative [39,41].  
220 Permutation tests of variable performance employed within the MaxEnt software platform used  
221 the training points to assess the relative contribution of each variable to the final averaged model  
222 in the context of the AUC statistic. A significant drop in the AUC statistic after a bioclimatic  
223 variable is removed suggests that the variable significantly contributes to the estimation of HS  
224 [43].

### 225 ***Climate change and habitat suitability analysis***

226 We projected HS for all 15 bumble bee species using bioclimatic data generated from  
227 three general circulation models (GCMs) with a 4.5 and 8.5 representative concentration  
228 pathway (RCP) for the year 2050 and 2070 [20]. The RCP is a greenhouse gas concentration  
229 trajectory that takes into account pollution and land-use change that occurred over the twenty-  
230 first century [20]. We elected to use an intermediate greenhouse emission scenario (RCP 4.5) and  
231 a high emission scenario (RCP 8.5) when projecting HS for each species in 2050 and 2070 in the  
232 Pacific Northwest. The three GCMs used in our analysis are the Community Climate System  
233 Model 4 (CCSM4), the Hadley Global Environmental Model 2- Atmosphere (HADGEM2-AO),  
234 and the Model for Interdisciplinary Research on Climate Earth System Model (MIROC-ESM-  
235 CHEM). The three GCMs were downloaded from the WorldClim database as described above

236 (<http://worldclim>), and can be examined on the Climate Model Intercomparison Project Phase 5  
237 (CMIP 5) (<https://cmip.llnl.gov/>).

238 SDMs for each species were averaged across the three GCMs according to RCP and year  
239 combinations to estimate HS under different climate change scenarios. To calculate HS change  
240 for each species, we subtracted projected HS based on the averaged GCM projections across the  
241 three models from contemporary HS estimates. We used a simple paired Wilcoxon test to  
242 determine if there was a significant difference in HS between contemporary and projected HS in  
243 2050 and 2070. Except for the MaxEnt analysis, all statistical analyses were conducted with R  
244 v3.5.2 [38].

245

## 246 **Results**

### 247 *Field Survey*

248 In total, fifteen bumble bee species were detected in our survey. We captured 773 bumble  
249 bees across 23 unique field sites from 15 – 25 of July and 2 August 2013 (Table S1). Of the 773,  
250 272 voucher specimens were curated and are currently housed at the NPIC in Logan, Utah (Table  
251 S2). The remaining 501 specimens not retained as vouchers were released at the collection site  
252 after field identification and tissue sampling. Average temperatures during the field survey were  
253  $22.3 \pm 0.69$  °C, average relative humidity was  $50.6 \pm 2.21\%$  and average wind speed was  $1.9 \pm$   
254  $0.41$  kph. The total specimens surveyed from each park are EBLA = 35, FOVA = 55, LEWI =  
255 33, MORA = 238, NOCA = 118, OLYM = 173, SAJH = 121 (Fig 1). The most abundant to least  
256 abundant species are as follows: *B. flavifrons* ( $n = 149$ ), *B. sylvicola* ( $n = 119$ ), *B. sitkensis* ( $n =$   
257  $98$ ), *B. bifarius* ( $n = 84$ ), *B. mixtus* ( $n = 82$ ), *B. melanopygus* ( $n = 69$ ), *B. vosnesenskii* ( $n = 54$ ),  
258 *B. rufocinctus* ( $n = 38$ ), *B. caliginosus* ( $n = 24$ ), *B. appositus* ( $n = 18$ ), *B. californicus* ( $n = 14$ ), *B.*  
259 *occidentalis* ( $n = 6$ ), *B. vandykei* ( $n = 4$ ), *B. griseocollis* ( $n = 1$ ), *B. nevadensis* ( $n = 1$ ),  
260 unidentified *Bombus* ( $n = 12$ ). The unidentified *Bombus* included specimens that could not be  
261 reliably identified to species due to the poor condition of the physical characteristics needed for  
262 diagnosis [36]. Distribution and abundance of each species in the current study are available as  
263 supplementary figures (Figs S1-S15). *Bombus occidentalis* was detected at two sites in OLYM in  
264 the Royal Basin Area. This is the first time since 1955 that *B. occidentalis* has been detected  
265 within the boundaries of OLYM. However, it should be noted that a single *B. occidentalis* has

266 been detected on Mt. Townsend in Olympic National Forest by a citizen scientist in 2011, and  
267 more recently in Seattle, Washington in 2013 [44]. All specimens identified in this survey are  
268 recorded in Table S1.

## 269 ***Community analysis***

270 To assess community richness and diversity, only specimens that were identified to  
271 species were used for the final analyses ( $n = 761$ ). Thus, we removed the 12 unidentified  
272 specimens from the total 773 specimens surveyed. Across the sites assessed in our study, we  
273 found species richness to be positively correlated with rarefied species richness ( $t = 5.61$ ,  $df = 17$ ,  
274  $p < 0.001$ ,  $r = 0.81$ ) and the inverse Simpson's diversity index ( $t = 3.78$ ,  $df = 17$ ,  $p = 0.001$ ,  $r =$   
275  $0.68$ ). Altitude was a significant predictor of species richness and diversity (simple linear  
276 regressions; richness:  $F_{1, 17} = 9.68$ ,  $p = 0.01$ ,  $r^2 = 0.33$ ; diversity:  $F_{1, 17} = 7.38$ ,  $p = 0.01$ ,  $r^2 = 0.26$ )  
277 (Fig 2). Both species richness and diversity increased by 0.001 for each one meter increase in  
278 altitude [richness $\sim 3.24 + 0.001$  (altitude), diversity $\sim 2.43 + 0.001$  (altitude)]. Finally, NMDS  
279 analysis found altitude to be a significant predictor of community composition, with high and  
280 low altitude communities clearly demarcated (NMDS,  $k = 2$ , stress = 0.13,  $r^2 = 0.66$ ,  $p = 0.001$ ).  
281 Specifically, bumble bee communities found at altitudes greater than 500 m shared species that  
282 were relatively unique to communities found at altitudes less than 500 m (Fig 3).

283

284 **Fig 2. Distribution of rarefied bumble bee species richness (A) and inverse Simpson's**  
285 **diversity index (B) across an altitude gradient in US National Parks in the Pacific**  
286 **Northwest.**

287

288 **Fig 3. Nonmetric dimensional scaling analysis (NMDS) of bumble bee community**  
289 **dissimilarity across US National Parks in the Pacific Northwest.** Locations clustered closer  
290 together suggest that bumble bee communities are more similar in composition. High altitude  
291 communities (gray points) are more similar in composition than low altitude communities (black  
292 points). Species names are presented in the figure to infer that species clustered closer together  
293 are found to co-occur, whereas species distributed further apart are less likely to co-occur. The  
294 point under *B. nevadensis* represents *B. griseocollis*, whereas the point under *B. vandykei*  
295 represents *B. occidentalis*.

296

## 297 ***Species distribution modelling***

298 We compiled a total of 113,551 specimens records across the 15 species assessed in this  
299 study from GBIF [45]. After filtering for unique spatial records, the dataset was reduced to 8,805  
300 records. The average number of records per species available for each SDM is  $587 \pm 129$  SE. A  
301 summary of the number of records of the target species used for SDMs in our study is found in  
302 Table S3. Following correlation analysis, 11 of the 19 bioclimatic variables were used in the  
303 SDM: BIO1 = annual mean temperature, BIO2 = mean diurnal range (mean of monthly  
304 (maximum temp - minimum temp)), BIO3 = isothermality (BIO2/BIO7) (\*100), BIO4 =  
305 temperature seasonality (standard deviation \*100), BIO5 = maximum temperature of warmest  
306 month, BIO8 = mean temperature of wettest quarter, BIO9 = mean temperature of driest quarter,  
307 BIO13 = precipitation of wettest month, BIO14 = precipitation of driest month, BIO15 =  
308 precipitation seasonality (coefficient of variation), BIO18 = precipitation of warmest quarter. All  
309 15 SDMs constructed in this study performed well, with  $AUC_{\text{test}}$  values between 0.79 and 0.96  
310 (mean  $AUC_{\text{Test}}$ :  $0.87 \pm 0.03$ ) (Table S4).

311 Precipitation is a significant predictor of bumble bee HS across all 15 bumble bee species  
312 studied in the Pacific Northwest. Averaging all 15 species-specific SDM found that precipitation  
313 of wettest month (BIO13) contributed the most to SDM construction [ $18 \pm 3.69$  mean percent  
314 contribution on average plus/minus standard error (SE)], followed by mean temperature of  
315 wettest quarter (BIO 8) ( $17.4 \pm 3.52$  mean percent contribution on average), and precipitation of  
316 driest month (BIO14), ( $16.83 \pm 5.02$  mean percent contribution on average) (Table S5).  
317 Furthermore, when the bioclimatic variables are permuted in a SDM, BIO13 and BIO8 remain as  
318 important variables across the 15 different SDMs (BIO13:  $20.46 \pm 2.$  mean permutation  
319 importance; BIO 8:  $14.31 \pm 1.87$  mean permutation importance), whereas precipitation  
320 seasonality (BIO15), was identified be the 2<sup>nd</sup> most imported variable after permutation ( $16.02 \pm$   
321  $2.77$  mean permutation importance).

## 322 ***Climate change and habitat suitability analysis***

323 Across both RCP scenarios and 2050 and 2070 time step combinations, it was clear that  
324 the vast majority of Pacific Northwest bumble bee species will undergo HS loss in the US  
325 National Parks within the study region (Fig 4) (Table 2). *Bombus vosnesenskii*, *B. sitkensis*, *B.*  
326 *caliginous*, and *B. californicus* might experience a small degree of HS gain within the study

327 region (Fig 4). Relative to our sampled field sites in our study, *B. bifarius*, *B. flavifrons*, *B.*  
328 *melanopygus*, *B. mixtus*, and *B. sylvicola* are hypothesized to undergo significant HS loss in US  
329 National Park in the Pacific Northwest, whereas *B. vosnesenskii* and *B. sitkensis* are  
330 hypothesized to undergo significant HS gain by 2050 and 2070 (Paired Wilcoxon tests, all  $P <$   
331 0.05) (Fig 4) (Table S6). Finally, if species are to be prioritized by HS loss averaged across both  
332 RCP scenarios and time steps, the list of species from most vulnerable to least vulnerable to  
333 climate change are as follows: 1) *B. vandykei*, 2) *B. sylvicola*, 3) *B. bifarius*, 4) *B. melanopygus*,  
334 5) *B. occidentalis*, 6) *B. flavifrons*, 7) *B. griseocollis*, 8) *B. nevadensis*, 9) *B. rufocinctus*, 10) *B.*  
335 *mixtus*, 11) *B. appositus*, 12) *B. sitkensis*, 13) *B. californicus*, 14) *B. caliginosus*, 15) *B.*  
336 *vosnesenskii* (Fig 5).

337

338 **Fig 4. Habitat Suitability (HS) comparisons across 15 bumble bee species surveyed across**  
339 **and adjacent to US National Parks in the Pacific Northwest.** Comparisons for each species  
340 are made between modeled HS of contemporary and future (2050 and 2070) distributions under  
341 two representative concentration pathways (RCP) [20]. (A) RCP 4.5, 2050, (B) RCP 4.5, 2070,  
342 (C) RCP 8.5, 2050, and (D) RCP 8.5, 2070. The X-axis represents the difference between  
343 contemporary and future HS. Values to the left of the dashed red line indicate a decrease in HS,  
344 whereas values to right of the dashed red line indicate an increase in HS.

345

346 **Fig 5. Mean ( $\pm$ SE) habitat suitability change across two relative concentration pathway**  
347 **scenarios (RCP 4.5 and 8.5) and two time steps (2050 and 2070) for 15 bumble bee species**  
348 **in US National Parks in the Pacific Northwest.**

349

## 350 Discussion

351 We discovered that bumble bee community composition and diversity can be predicted  
352 by their distribution across an altitude gradient in the Pacific Northwest. As expected, we found  
353 that both species richness and diversity were positively correlated with altitude (Fig 2). We also  
354 found that bumble bee community composition can be predicted by species' distribution across  
355 an altitude gradient, with high altitude communities clustering differently than low altitude  
356 communities (Fig 3). Finally, an assessment of HS under two RCP scenarios (4.5 and 8.5) and

357 two time steps (2050 and 2070) found that 80% of bumble bees found within the national park  
358 boundaries in the Pacific Northwest are projected to undergo HS loss (Figs 4, 5).

359 Our study supports the consensus that bumble bee community diversity and composition  
360 are predicted by bees' distributions across an altitude gradient [15,46–49]. The greatest diversity  
361 of bumble bees in North America is found primarily in areas that are topographically complex  
362 environments, especially in mountainous regions of the western US [26,32]. Bumble bee species  
363 that are found predominantly in high alpine environments run the greatest risk of losing suitable  
364 habitat in the next 50 years. Why alpine bumble bees are most vulnerable to decline is likely due  
365 to the narrow bioclimatic niche they inhabit [22,50]. In our study, we find that bumble bee HS is  
366 best predicted by bioclimatic variables that capture precipitation estimates. The Pacific  
367 Northwest is a region of North America defined by rain forest as it receives a wealth of  
368 precipitation. The region is subject to receive more precipitation based on GCM projections for  
369 the region over the next 50 years [34], thus it is likely that that bumble bee HS will be impacted  
370 by changes in precipitation patterns in the region as precipitation is a significant predictor of  
371 bumble bee HS in our study.

372 The probable species composition of a bumble bee community can be demarcated based  
373 on altitude in the Pacific Northwest (Fig 3). In low altitude environments, the following bumble  
374 bees are likely to be detected: *B. nevadensis*, *B. griseocollis*, *B. vosnesenskii*, *B. californicus*, *B.*  
375 *caliginosus*, *B. appositus*, *B. rufocinctus*, and *B. flavifrons*. Alternatively the following bumble  
376 bees are likely to be detected in high altitude environments: *B. vandykei*, *B. occidentalis*, *B.*  
377 *mixtus*, *B. bifarius*, *B. sitkensis*, *B. melanopygus*, *B. sylvicola*. In our study, we found that 80% of  
378 the species studied are projected to experience significant HS loss regardless of the GCM RCP  
379 scenario or time step (Figs 4, 5). It is clear that high altitude bumble bee species will experience  
380 the greatest HS loss compared to low altitude bumble bee species (Fig 4).

381 Recent climate warming is suspected to have shifted bumble bee distributions across an  
382 altitude gradient, with low altitude environments losing species richness, and high altitude  
383 environments gaining species richness [15]. The shift in species richness is hypothesized to be an  
384 artifact of bumble bees dispersing to high altitudes as low altitude environments have become  
385 unsuitable bumble bee habitat. In the Pacific Northwest, bumble bee communities are more  
386 species rich and diverse in high altitude environments relative to low altitude environments (Fig  
387 2). Therefore, if bumble bees from low altitude environments disperse to high altitude

388 **Table 2.** Paired Wilcoxon (W) tests results comparing contemporary habitat suitability values and for the 4.5 and 8.5 representative  
 389 concentration pathway (RCP) and future year scenarios (2050 and 2070) for 15 bumble bee species in US National Parks in the Pacific  
 390 Northwest [20].

|                        | Significant<br>at<br>P < 0.05? | RCP 4.5, Year 2050 |         | RCP 4.5, Year 2070 |         | RCP 8.5, Year 2050 |         | RCP 8.5, Year 2070 |         |
|------------------------|--------------------------------|--------------------|---------|--------------------|---------|--------------------|---------|--------------------|---------|
|                        |                                | W                  | P       | W                  | P       | W                  | P       | W                  | P       |
| <i>B. appositus</i>    | NS                             | 4                  | 0.333   | 4                  | 0.333   | 4                  | 0.333   | 4                  | 0.333   |
| <i>B. bifarius</i>     | *                              | 100                | 0.0002  | 100                | 0.0002  | 100                | 0.0002  | 100                | 0.0002  |
| <i>B. caliginosus</i>  | NS                             | 9                  | 0.1     | 9                  | 0.1     | 9                  | 0.1     | 9                  | 0.1     |
| <i>B. californicus</i> | NS                             | 9                  | 0.1     | 9                  | 0.1     | 9                  | 0.1     | 9                  | 0.1     |
| <i>B. flavifrons</i>   | *                              | 400                | 0.00001 | 400                | 0.00001 | 400                | 0.00001 | 400                | 0.00001 |
| <i>B. griseocollis</i> | NS                             | 1                  | 1       | 1                  | 1       | 1                  | 1       | 1                  | 1       |
| <i>B. melanopygus</i>  | *                              | 169                | 0.0001  | 169                | 0.0001  | 169                | 0.0001  | 169                | 0.0001  |
| <i>B. mixtus</i>       | *                              | 256                | 0.0001  | 256                | 0.0001  | 256                | 0.0001  | 256                | 0.0001  |
| <i>B. nevadensis</i>   | NS                             | 1                  | 1       | 1                  | 1       | 1                  | 1       | 1                  | 1       |
| <i>B. occidentalis</i> | NS                             | 4                  | 0.333   | 4                  | 0.333   | 4                  | 0.333   | 4                  | 0.333   |
| <i>B. rufocinctus</i>  | NS                             | 4                  | 0.333   | 4                  | 0.333   | 4                  | 0.333   | 4                  | 0.333   |
| <i>B. sitkensis</i>    | *                              | 169                | 0.0001  | 169                | 0.0001  | 169                | 0.0001  | 169                | 0.0001  |
| <i>B. sylvicola</i>    | *                              | 120                | 0.0001  | 121                | 0.00001 | 121                | 0.00001 | 120                | 0.0001  |
| <i>B. vandykei</i>     | NS                             | 4                  | 0.333   | 4                  | 0.333   | 4                  | 0.333   | 4                  | 0.333   |
| <i>B. vosnesenskii</i> | *                              | 48                 | 0.001   | 47                 | 0.002   | 48                 | 0.002   | 40                 | 0.053   |

391 environments, it is likely that species will compete for floral, nest, and hibernacula resources in  
392 an environment that is also spatially limited in comparison to low altitude environments [51–53].  
393 However, even if floral resources become limited, recent research suggests that some bumble  
394 bees might arguably be resilient to resource loss, as demonstrated *B. sylvicola* and *B. balteatus*  
395 populations in alpine environments of Colorado [16]. Selection for *B. sylvicola* and *B. balteatus*  
396 individuals with shorter proboscis to more effectively forage for floral resources has been  
397 documented in Colorado populations due to the decline of flowers with long corollas. In the case  
398 of Pacific Northwest bumble bees, the increase of competition by low altitude species coupled  
399 with expected shifts in floral resources abundance, diversity, and phenology might greatly impact  
400 the evolutionary trajectory of high altitude bumble bee species [16].

401 We discovered that *B. vandykei* will be the most vulnerable to climate change in the  
402 Pacific Northwest, as our models predicted that it will incur the greatest HS loss ( $63 \pm 7$  percent  
403 mean HS loss) (Fig 5). Historically, *B. vandykei* has not been detected on the Olympic Peninsula  
404 [36], and has only been recently detected within the Olympic Mountains of OLYM [29].  
405 Furthermore, *B. vandykei* is a very rare bumble bee, and comprised only 0.52% ( $n = 4$ ) of the  
406 total bumble bees collected in our survey (Fig S14). Bumble bees are well known to be  
407 misidentified due to convergent setal coloration patterns [36,54], thus, it is possible that the  
408 species may have been misidentified in previous assessments of the Pacific Northwest. Given  
409 that *B. vandykei* is a rare and potentially misidentified bumble bee, as evidence by lack of  
410 detection in historic surveys of the species [36], the classification of the species as most  
411 vulnerable to the effects of climate change is warranted.

412 Our HS analysis further suggests that *B. sylvicola* will experience great HS loss in the  
413 Pacific Northwest, with HS loss estimates between 52% and 67% under the different RCP  
414 scenario and year combinations ( $59 \pm 4$  percent mean HS loss) (Fig 5). Like *B. vandykei*, *B.*  
415 *sylvicola* has only been recently detected in OLYM [29], and yet it is poised to be one of the  
416 species most vulnerable to the effects of climate change. Populations of *B. sylvicola* in the  
417 Pacific Northwest form unique genetic clusters that are associated with their mountain province  
418 of origin, and are associated with low population genetic diversity [27]. Projected HS loss in the  
419 next 50 years coupled with low genetic diversity and isolation are factors that suggest that *B.*  
420 *sylvicola* is at great risk for population decline and extinction.



421 Finally, our survey found *B. occidentalis* to be restricted to high altitude environments  
422 based on the current sampling effort (Fig. 3). However, previous studies suggests that *B.*  
423 *occidentalis* was a historically abundant bumble bee species found at low altitude environments  
424 in the Pacific Northwest [10,55,56]. The hypothesized cause of decline in wild *B. occidentalis* is  
425 attributed to pathogens [10] and land-use change [7]. In our study, we did not assess pathogen  
426 vulnerability for all 15 bumble bee species. However, previous range-wide investigations of  
427 pathogen incidence in wild bumble bees suggest that several species that we documented in our  
428 study are associated with pathogens of concern including *Nosema bombi* and *Crithidia spp.* [57].  
429 Future research could examine the intersection between climate and pathogen incidence in  
430 assessing bumble bee vulnerability in the Pacific Northwest [56].

431 Our study contributes to an important framework for identifying which bumble bee  
432 species in US National Parks are most vulnerable to projected climate change in the next 50  
433 years [12]. Specifically, we categorize which bumble bee species are predicted to incur the  
434 greatest HS change in the Pacific Northwest. Bumble bees are poised to experience shifts in HS  
435 across both altitude and latitude in the next 50 years [3]. Species loss at low latitude  
436 environments and species gain in high latitude environments are estimated to occur  
437 predominantly eastern North America [2]. However, in western North America, where the  
438 landscape is characterized by a diversity of mountain ranges, the loss of bumble bee diversity is  
439 complex, likely due to differences in community assemblages across the region [2]. Along the  
440 Rocky Mountain spine, it appears that species gain is estimated to occur in some regions, likely  
441 due to a shift in HS across a latitude gradient. However, in all mountain provinces significant  
442 species loss in western North America is expected to occur across an altitude gradient [2]. Our  
443 regional study in the Pacific Northwest support the inference of Sirois-Delise and Kerr [2] that  
444 most bumble bee species will experience significant HS loss at low altitudes and latitudes, which  
445 will only be exacerbated by their inability to disperse to across geographic distance due to the  
446 lack of suitable habitat [27,28,43].

447 The results presented here will be useful in helping managers and stakeholders prioritize  
448 restoration and conservation efforts of bumble bees within US National Parks and adjacent areas  
449 in the Pacific Northwest. Specifically, as we have identified which species are most vulnerable to  
450 climate change, stakeholders can begin examining what types of other limiting factors might be  
451 useful to buffer the impacts of a warming climate on the most vulnerable. For example,

452 stakeholders can provide adequate floral resources to the most vulnerable species by either  
453 protecting or planting species of critical importance [58]. Alternatively, combining SDM with  
454 population genetic data may inform the potential for habitat corridors as a mitigation strategy to  
455 ensure that vulnerable bumble bee species do not become isolated from adjacent populations  
456 [27,28]. Whatever the strategy, identifying which species is most vulnerable to climate change is  
457 a significant first step in the prioritization of conservation and management action.

458

## 459 **Acknowledgements**

460 We thank Joyce Knoblett and Chris Lorion for their assistance with field surveys, Harold Ikerd  
461 for database support, and Thor Hanson for field survey assistance and hospitality. We also thank  
462 Dr. Jerry Freilich and Dr. Regina Rochefort for their unwavering support in the study of bumble  
463 bees in National Parks. This study was made possible with grant #NPS P13PG00149/FSN from  
464 the North Cascades and Coast Science Learning Network (NCCSLN) to JPS and WSS. JBK is  
465 currently supported by a David H. Smith Postdoctoral Fellowship. Permits to survey bumble  
466 bees from each US National Park are as follows: NOCA-2013-SCI-0012, SAJH-2013-SCI-0002,  
467 OLYM-2013-SCI-0049, OLYM-2014-SCI-0065, MORA-2013-SCI-0037, EBLA-2013-SCI-  
468 0001, LEWI-2013-SCI-0003, NCCO-2014-SCI-0006. A copy of the final report submitted to the  
469 US National Park Service may be found on the US Department of Interior, National Park Service  
470 Integrated Resource Management Application Portal, Research Permit and Reporting System at  
471 the following link: <https://irma.nps.gov/rprs/IAR/Profile/103061> (Report #: NOCA-00139). The  
472 US Department of Agriculture, Agricultural Research Service (USDA-ARS) is an equal  
473 opportunity/affirmative action employer and all agency services are available without  
474 discrimination. Mention of commercial products and organizations in this manuscript is solely to  
475 provide specific information. It does not constitute endorsement by USDA-ARS over other  
476 products and organizations not mentioned.

477

## 478 **Supporting Information**

479

480 **Table S1.** Database of the bumble bee specimens identified in the national parks of the North  
481 Coast and Cascades Network. Genus = genus, Species = species, M = male, F = female (Non-

482 queen), Q = queen, Park = park acronym, Location Description = location description, Day0 =  
483 day, Mon0 = month, Year0 = year, Time0 = time survey started, Time1 = time survey ended,  
484 Floral host = flowering plant collected specimen on (if available), Col1 = collector 1, Col2 =  
485 collector 2, Col3 = collector 3, Col4 = collector 4, Temperature = temperature (degrees C), Wind  
486 Speed = wind speed in kph, Cloud cover = 1 (full cloud cover)/ 0 (full sun), Relative humidity =  
487 relative humidity.

488

489 **Table S2.** Voucher of the specimens collected at the national parks of the North Coast and  
490 Cascade Network following US National Park Service data deposition formatting. Catalog # =  
491 catalog number, Accession # = accession number, Cataloger = person who cataloged voucher,  
492 Class 1 = all Biology, Class 2 = all Animalia, Class 3 = all Insecta, Class 4 = all Hymenoptera,  
493 Collection Date = collection date, Collection # = not applicable, Collector = persons who  
494 collected specimens, County = county specimens collected, Elevation = elevation (m), Family =  
495 all Apoidea/Apidae, Identified by = species identification expert, Locality = location surveyed,  
496 Location = location where specimens are deposited, Obj/Science = species name, State = state  
497 code of locality, Habitat/Comm = not applicable, TRS = township and range search, Aspect =  
498 not applicable, Description = sex of specimen, if applicable.

499

500 **Table S3.** Distribution record summary of 15 bumble bees in USA (minimum longitude = -125;  
501 maximum longitude = -100; maximum latitude = 30; minimum latitude = 49; WGS 1984)  
502 queried from the Global Biodiversity Information Facility (GBIF; <http://gbif.org>). Records were  
503 used to construct species distribution models in the PNW (minimum longitude = -125; maximum  
504 longitude = -120; maximum latitude = 45; minimum latitude = 49; WGS 1984). Unique records  
505 = spatially unique records (duplicates removed from total GBIF records per species); Spatial  
506 filter ( $\sim 5 \text{ km}^2$ ) = spatially unique records are filtered to a resolution of  $\sim 5 \text{ km}^2$ ; Proportion unique  
507 records = Unique records/Total GBIF records; Proportion unique & spatial filter ( $\sim 5 \text{ km}^2$ ) =  
508 Spatial filter ( $\sim 5 \text{ km}^2$ )/Unique records.

509

510 **Table S4.** Area under the curve (AUC) species distribution model (SDM) performance  
511 summaries for 15 bumble bees species.

512

513 **Table S5.** Mean percent (%) contribution and permutation importance of 11 bioclimatic  
514 variables across 15 bumble bees species in US National Parks in the Pacific Northwest.  
515 Maximum = maximum mean value, Minimum = minimum mean value, SE = standard error.  
516 BIO1 = Annual Mean Temperature, BIO2 = Mean Diurnal Range (Mean of monthly (max temp -  
517 min temp)), BIO3 = Isothermality (BIO2/BIO7) (\* 100), BIO4 = Temperature Seasonality  
518 (standard deviation \*100), BIO5 = Max Temperature of Warmest Month, BIO8 = Mean  
519 Temperature of Wettest Quarter, BIO9 = Mean Temperature of Driest Quarter, BIO13 =  
520 Precipitation of Wettest Month, BIO14 = Precipitation of Driest Month, BIO15 = Precipitation  
521 Seasonality (Coefficient of Variation), BIO18 = Precipitation of Warmest Quarter.

522

523 **Figure S1.** Relative abundance of *B. appositus* across US National Parks in the Pacific  
524 Northwest.

525

526 **Figure S2.** Relative abundance of *B. bifarius* across US National Parks in the Pacific Northwest.

527

528 **Figure S3.** Relative abundance of *B. californicus* across US National Parks in the Pacific  
529 Northwest.

530

531 **Figure S4.** Relative abundance of *B. caliginosus* across US National Parks in the Pacific  
532 Northwest.

533

534 **Figure S5.** Relative abundance of *B. flavifrons* across US National Parks in the Pacific  
535 Northwest.

536

537 **Figure S6.** Relative abundance of *B. griseocollis* across US National Parks in the Pacific  
538 Northwest.

539

540 **Figure S7.** Relative abundance of *B. melanopygus* across US National Parks in the Pacific  
541 Northwest.

542

543 **Figure S8.** Relative abundance of *B. mixtus* across US National Parks in the Pacific Northwest.

544

545 **Figure S9.** Relative abundance of *B. nevadensis* across US National Parks in the Pacific

546 Northwest.

547

548 **Figure S10.** Relative abundance of *B. occidentalis* across US National Parks in the Pacific

549 Northwest.

550

551 **Figure S11.** Relative abundance of *B. rufocinctus* across US National Parks in the Pacific

552 Northwest.

553

554 **Figure S12.** Relative abundance of *B. sitkensis* across US National Parks in the Pacific

555 Northwest.

556

557 **Figure S13.** Relative abundance of *B. sylvicola* across US National Parks in the Pacific

558 Northwest.

559

560 **Figure S14.** Relative abundance of *B. vandykei* across US National Parks in the Pacific

561 Northwest.

562

563 **Figure S15.** Relative abundance of *B. vosnesenskii* across US National Parks in the Pacific

564 Northwest.

565

## 566 **References**

567 1. Winfree R, Aguilar R, Vázquez DP, LeBuhn G, Aizen MA. A meta-analysis of bees'  
568 responses to anthropogenic disturbance. *Ecology*. 2009;90: 2068–2076.

569 2. Sirois-Delisle C, Kerr JT. Climate change-driven range losses among bumblebee species are  
570 poised to accelerate. *Sci Rep*. 2018;8: 14464.

571 3. Kerr JT, Pindar A, Galpern P, Packer L, Potts SG, Roberts SM, et al. Climate change  
572 impacts on bumblebees converge across continents. *Science*. 2015;349: 177–180.

573 4. Bartomeus I, Ascher JS, Wagner D, Danforth BN, Colla S, Kornbluth S, et al. Climate-  
574 associated phenological advances in bee pollinators and bee-pollinated plants. *Proc Natl*

- 575 Acad Sci USA. 2011;108: 20645–20649.
- 576 5. Goulson D, Lye GC, Darvill B. Decline and conservation of bumble bees. *Annu Rev*  
577 *Entomol.* 2008;53: 191–208.
- 578 6. Cameron SA, Lim HC, Lozier JD, Duennes MA, Thorp R. Test of the invasive pathogen  
579 hypothesis of bumble bee decline in North America. *Proc Natl Acad Sci USA.* 2016;  
580 doi:10.1073/pnas.1525266113.
- 581 7. McFrederick QS, LeBuhn G. Are urban parks refuges for bumble bees *Bombus* spp.  
582 (Hymenoptera: Apidae)? *Biol Conserv.* 2006;129: 372–382.
- 583 8. Herrera JM, Ploquin EF, Rodríguez-Pérez J, Obeso JR. Determining habitat suitability for  
584 bumblebees in a mountain system: a baseline approach for testing the impact of climate  
585 change on the occurrence and abundance of species. *J Biogeogr.* 2014;41: 700–712.
- 586 9. Sachman-Ruiz B, Narváez-Padilla V, Reynaud E. Commercial *Bombus impatiens* as  
587 reservoirs of emerging infectious diseases in central México. *Biol Invasions.* 2015; 1–11.
- 588 10. Cameron SA, Lozier JD, Strange JP, Koch JB, Cordes N, Solter LF, et al. Patterns of  
589 widespread decline in North American bumble bees. *Proc Natl Acad Sci USA.* 2011;108:  
590 662–667.
- 591 11. Whitehorn PR, O’Connor S, Wackers FL, Goulson D. Neonicotinoid pesticide reduces  
592 bumble bee colony growth and queen production. *Science.* 2012;336: 351–352.
- 593 12. Williams SE, Shoo LP, Isaac JL, Hoffmann AA, Langham G. Towards an integrated  
594 framework for assessing the vulnerability of species to climate change. *PLoS Biol.* 2008;6:  
595 2621–2626.
- 596 13. Foden WB, Butchart SHM, Stuart SN, Vié J-C, Akçakaya HR, Angulo A, et al. Identifying  
597 the world’s most climate change vulnerable species: a systematic trait-based assessment of  
598 all birds, amphibians and corals. *PLoS One.* 2013;8: e65427.
- 599 14. Rasmann S, Pellissier L, Defosse E, Jactel H, Kunstler G. Climate-driven change in plant-  
600 insect interactions along elevation gradients. *Funct Ecol.* 2014;28: 46–54.
- 601 15. Fourcade Y, Åström S, Öckinger E. Climate and land-cover change alter bumblebee species  
602 richness and community composition in subalpine areas. *Biodivers Conserv.* 2019;28: 639–  
603 653.
- 604 16. Miller-Struttman NE, Geib JC, Franklin JD, Kevan PG, Holdo RM, Ebert-May D, et al.  
605 Functional mismatch in a bumble bee pollination mutualism under climate change. *Science.*  
606 2015;349: 1541–1544.
- 607 17. Dirnböck T, Essl F, Rabitsch W. Disproportional risk for habitat loss of high-altitude  
608 endemic species under climate change. *Glob Chang Biol.* 2011;17: 990–996.

- 609 18. Parmesan C. Ecological and evolutionary responses to recent climate change. *Annu Rev*  
610 *Ecol Evol Syst.* 2006;37: 637–669.
- 611 19. Williams PH, Osborne JL. Bumblebee vulnerability and conservation world-wide.  
612 *Apidologie.* 2009;40: 367–387.
- 613 20. IPCC. Climate Change 2014: Synthesis Report. Contribution of Working Groups I, II and  
614 III to the Fifth Assessment Report of the Intergovernmental Panel on Climate Change.  
615 2014; 151.
- 616 21. Hoffmann AA, Willi Y. Detecting genetic responses to environmental change. *Nat Rev*  
617 *Genet.* 2008;9: 421–432.
- 618 22. Williams P, Colla S, Xie Z. Bumblebee vulnerability: common correlates of winners and  
619 losers across three continents. *Conserv Biol.* 2009;23: 931–940.
- 620 23. Hoffmann AA, Sgrò CM. Climate change and evolutionary adaptation. *Nature.* 2011;470:  
621 479–485.
- 622 24. Rubidge EM, Patton JL, Lim M, Cole Burton A, Brashares JS, Moritz C. Climate-induced  
623 range contraction drives genetic erosion in an alpine mammal. *Nat Clim Chang.* 2012;2:  
624 285–288.
- 625 25. Williams P. Bumblebees of the World. In: The Trustees of The Natural History Museum,  
626 London [Internet]. 2017 [cited 8 May 2017]. Available: [http://www.nhm.ac.uk/research-](http://www.nhm.ac.uk/research-curation/research/projects/bombus/)  
627 [curation/research/projects/bombus/](http://www.nhm.ac.uk/research-curation/research/projects/bombus/)
- 628 26. Koch JB, Strange JP, Williams P. Bumble Bees of the Western United States. San  
629 Francisco, CA: Pollinator Partnership; 2012.
- 630 27. Koch JB, Looney C, Sheppard WS, Strange JP. Patterns of population genetic structure and  
631 diversity across bumble bee communities in the Pacific Northwest. *Conserv Genet.*  
632 Springer; 2017;18: 507–520.
- 633 28. Lozier JD, Strange JP, Koch JB. Landscape heterogeneity predicts gene flow in a  
634 widespread polymorphic bumble bee, *Bombus bifarius* (Hymenoptera: Apidae). *Conserv*  
635 *Genet.* Springer; 2013;14: 1099–1110.
- 636 29. Koch JB, Looney C, Sheppard WS, Strange JP. Range extension of two bumble bee species  
637 (Hymenoptera: Apidae) into Olympic National Park. *Northwest Sci.* 2016;90: 228–234.
- 638 30. Lozier JD, Jackson JM, Dillon ME, Strange JP. Population genomics of divergence among  
639 extreme and intermediate color forms in a polymorphic insect. *Ecol Evol.* 2016;6: 1075–  
640 1091.
- 641 31. Fraser DF, Copley CR, Elle E. Changes in the status and distribution of the Yellow-faced  
642 Bumble Bee. *J Entomol Soc British Columbia.* 2012: 31–37.

- 643 32. Strange JP, Tripodi AD. Characterizing bumble bee (*Bombus*) communities in the United  
644 States and assessing a conservation monitoring method. *Ecol Evol.* 2019;00: 1.
- 645 33. Koch JB, Lozier J, Strange JP, Ikerd H, Griswold T, Cordes N, et al. USBombus, a database  
646 of contemporary survey data for North American Bumble Bees (Hymenoptera, Apidae,  
647 *Bombus*) distributed in the United States. *Biodivers Data J.* 2015; e6833.
- 648 34. Mote PW, Salathé EP Jr. Future climate in the Pacific Northwest. *Clim Change.* 2010;102:  
649 29–50.
- 650 35. Pacifici M, Foden WB, Visconti P, Watson JEM, Butchart SHM, Kovacs KM, et al.  
651 Assessing species vulnerability to climate change. *Nat Clim Chang.* 2015;5: 215.
- 652 36. Thorp R, Horning DS Jr, Dunning LL. Bumble Bees and Cuckoo Bumble Bees of  
653 California (Hymenoptera: Apidae). Berkeley and Los Angeles, CA: University of California  
654 Press; 1983.
- 655 37. Gotelli NJ. A primer of Ecology. Sunderland, MA: Sinauer Associates, Inc.; 2008.
- 656 38. R Core Development Team. R: A language and environment for statistical computing. R  
657 Foundation for Statistical Computing [Internet]. Vienna, Austria; 2018. Available:  
658 <http://www.R-project.org>
- 659 39. Phillips SJ, Dudík M, Schapire RE. A Maximum Entropy Approach to Species Distribution  
660 Modeling. Proceedings of the Twenty-first International Conference on Machine Learning.  
661 New York, NY, USA: ACM; 2004. p. 83.
- 662 40. Phillips SJ, Anderson RP, Dudík M, Schapire RE, Blair ME. Opening the black box: an  
663 open-source release of Maxent. *Ecography.* 2017;40: 887–893.
- 664 41. Elith J, Phillips SJ, Hastie T, Dudík M, Chee YE, Yates CJ. A statistical explanation of  
665 MaxEnt for ecologists. *Divers Distrib.* 2011;17: 43–57.
- 666 42. Hijmans RJ, Cameron SE, Parra JL, Jones PG, Jarvis A. Very high resolution interpolated  
667 climate surfaces for global land areas. *Int J Climatol.* 2005;25: 1965–1978.
- 668 43. Koch JB, Vandame R, Mérida-Rivas J, Sagot P, Strange J. Quaternary climate instability is  
669 correlated with patterns of population genetic variability in *Bombus huntii*. *Ecol Evol.*  
670 2018;108: 20645.
- 671 44. Doughton S. Native bee species spotted for first time since '90s. The Seattle Times. 14 Jul  
672 2013. Available: [https://www.seattletimes.com/seattle-news/native-bee-species-spotted-for-](https://www.seattletimes.com/seattle-news/native-bee-species-spotted-for-first-time-since-rsquo90s/)  
673 [first-time-since-rsquo90s/](https://www.seattletimes.com/seattle-news/native-bee-species-spotted-for-first-time-since-rsquo90s/)
- 674 45. GBIF.org. GBIF Occurrence Download [Internet]. Available:  
675 <https://doi.org/10.15468/dl.nwko8h>
- 676 46. Hatfield RG, LeBuhn G. Patch and landscape factors shape community assemblage of



- 677 bumble bees, *Bombus* spp. (Hymenoptera: Apidae), in montane meadows. *Biol Conserv.*  
678 2007;139: 150–158.
- 679 47. Williams P, Tang Y, Yao J, Cameron S. The bumblebees of Sichuan (Hymenoptera:  
680 Apidae, Bombini). *System Biodivers.* 2009;7: 101–189.
- 681 48. Marshall L, Biesmeijer JC, Rasmont P, Vereecken NJ, Dvorak L, Fitzpatrick U, et al. The  
682 interplay of climate and land use change affects the distribution of EU bumblebees. *Glob*  
683 *Chang Biol.* 2018;24: 101–116.
- 684 49. Hofmann MM, Fleischmann A, Renner SS. Correction to: Changes in the bee fauna of a  
685 German botanical garden between 1997 and 2017, attributable to climate warming, not  
686 other parameters. *Oecologia.* 2018; 187: 701–706.
- 687 50. Williams PH, Araújo MB, Rasmont P. Can vulnerability among British bumblebee  
688 (*Bombus*) species be explained by niche position and breadth? *Biol Conserv.* 2007;138:  
689 493–505.
- 690 51. Ings TC, Ward NL, Chittka L. Can commercially imported bumble bees out-compete their  
691 native conspecifics? *J Appl Ecol.* 2006;43: 940–948.
- 692 52. Ishii HS, Kadoya T, Kikuchi R, Suda S-I, Washitani I. Habitat and flower resource  
693 partitioning by an exotic and three native bumble bees in central Hokkaido, Japan. *Biol*  
694 *Conserv.* 2008;141: 2597–2607.
- 695 53. Russo L. Positive and Negative impacts of non-native bee species around the world. *Insects.*  
696 2016;7. doi:10.3390/insects7040069.
- 697 54. Koch JB. The decline and conservation status of North American bumble bees.  
698 digitalcommons.usu.edu; 2011; Available: <https://digitalcommons.usu.edu/etd/1015/>.
- 699 55. Koch JB, Strange JP. Constructing a species database and historic range maps for North  
700 American Bumble bees (*Bombus* sensu stricto Latrielle) to inform conservation decisions.  
701 *Uludag Bee Journal.* 2009;9: 97–108.
- 702 56. Rao S, Stephen WP, Kimoto C, DeBano SJ. The status of the ‘Red-Listed’ *Bombus*  
703 *occidentalis* (Hymenoptera: Apiformes) in Northeastern Oregon. *Northwest Sci.* 2011;85:  
704 64–67.
- 705 57. Cordes N, Huang W-F, Strange JP, Cameron SA, Griswold TL, Lozier JD, et al.  
706 Interspecific geographic distribution and variation of the pathogens *Nosema bombi* and  
707 *Crithidia* species in United States bumble bee populations. *J Invertebr Pathol.* 2012;109:  
708 209–216.
- 709 58. Potts SG, Vulliamy B, Dafni A, Ne’eman G, Willmer P. Linking bees and flowers: How do  
710 floral communities structure pollinator communities? *Ecology.* 2003;84: 2628–2642.

bioRxiv preprint doi: <https://doi.org/10.1101/610071>; this version posted April 15, 2019. The copyright holder for this preprint (which was not certified by peer review) is the author/funder. This article is a US Government work. It is not subject to copyright under 17 USC 105 and is also made available for use under a CC0 license.

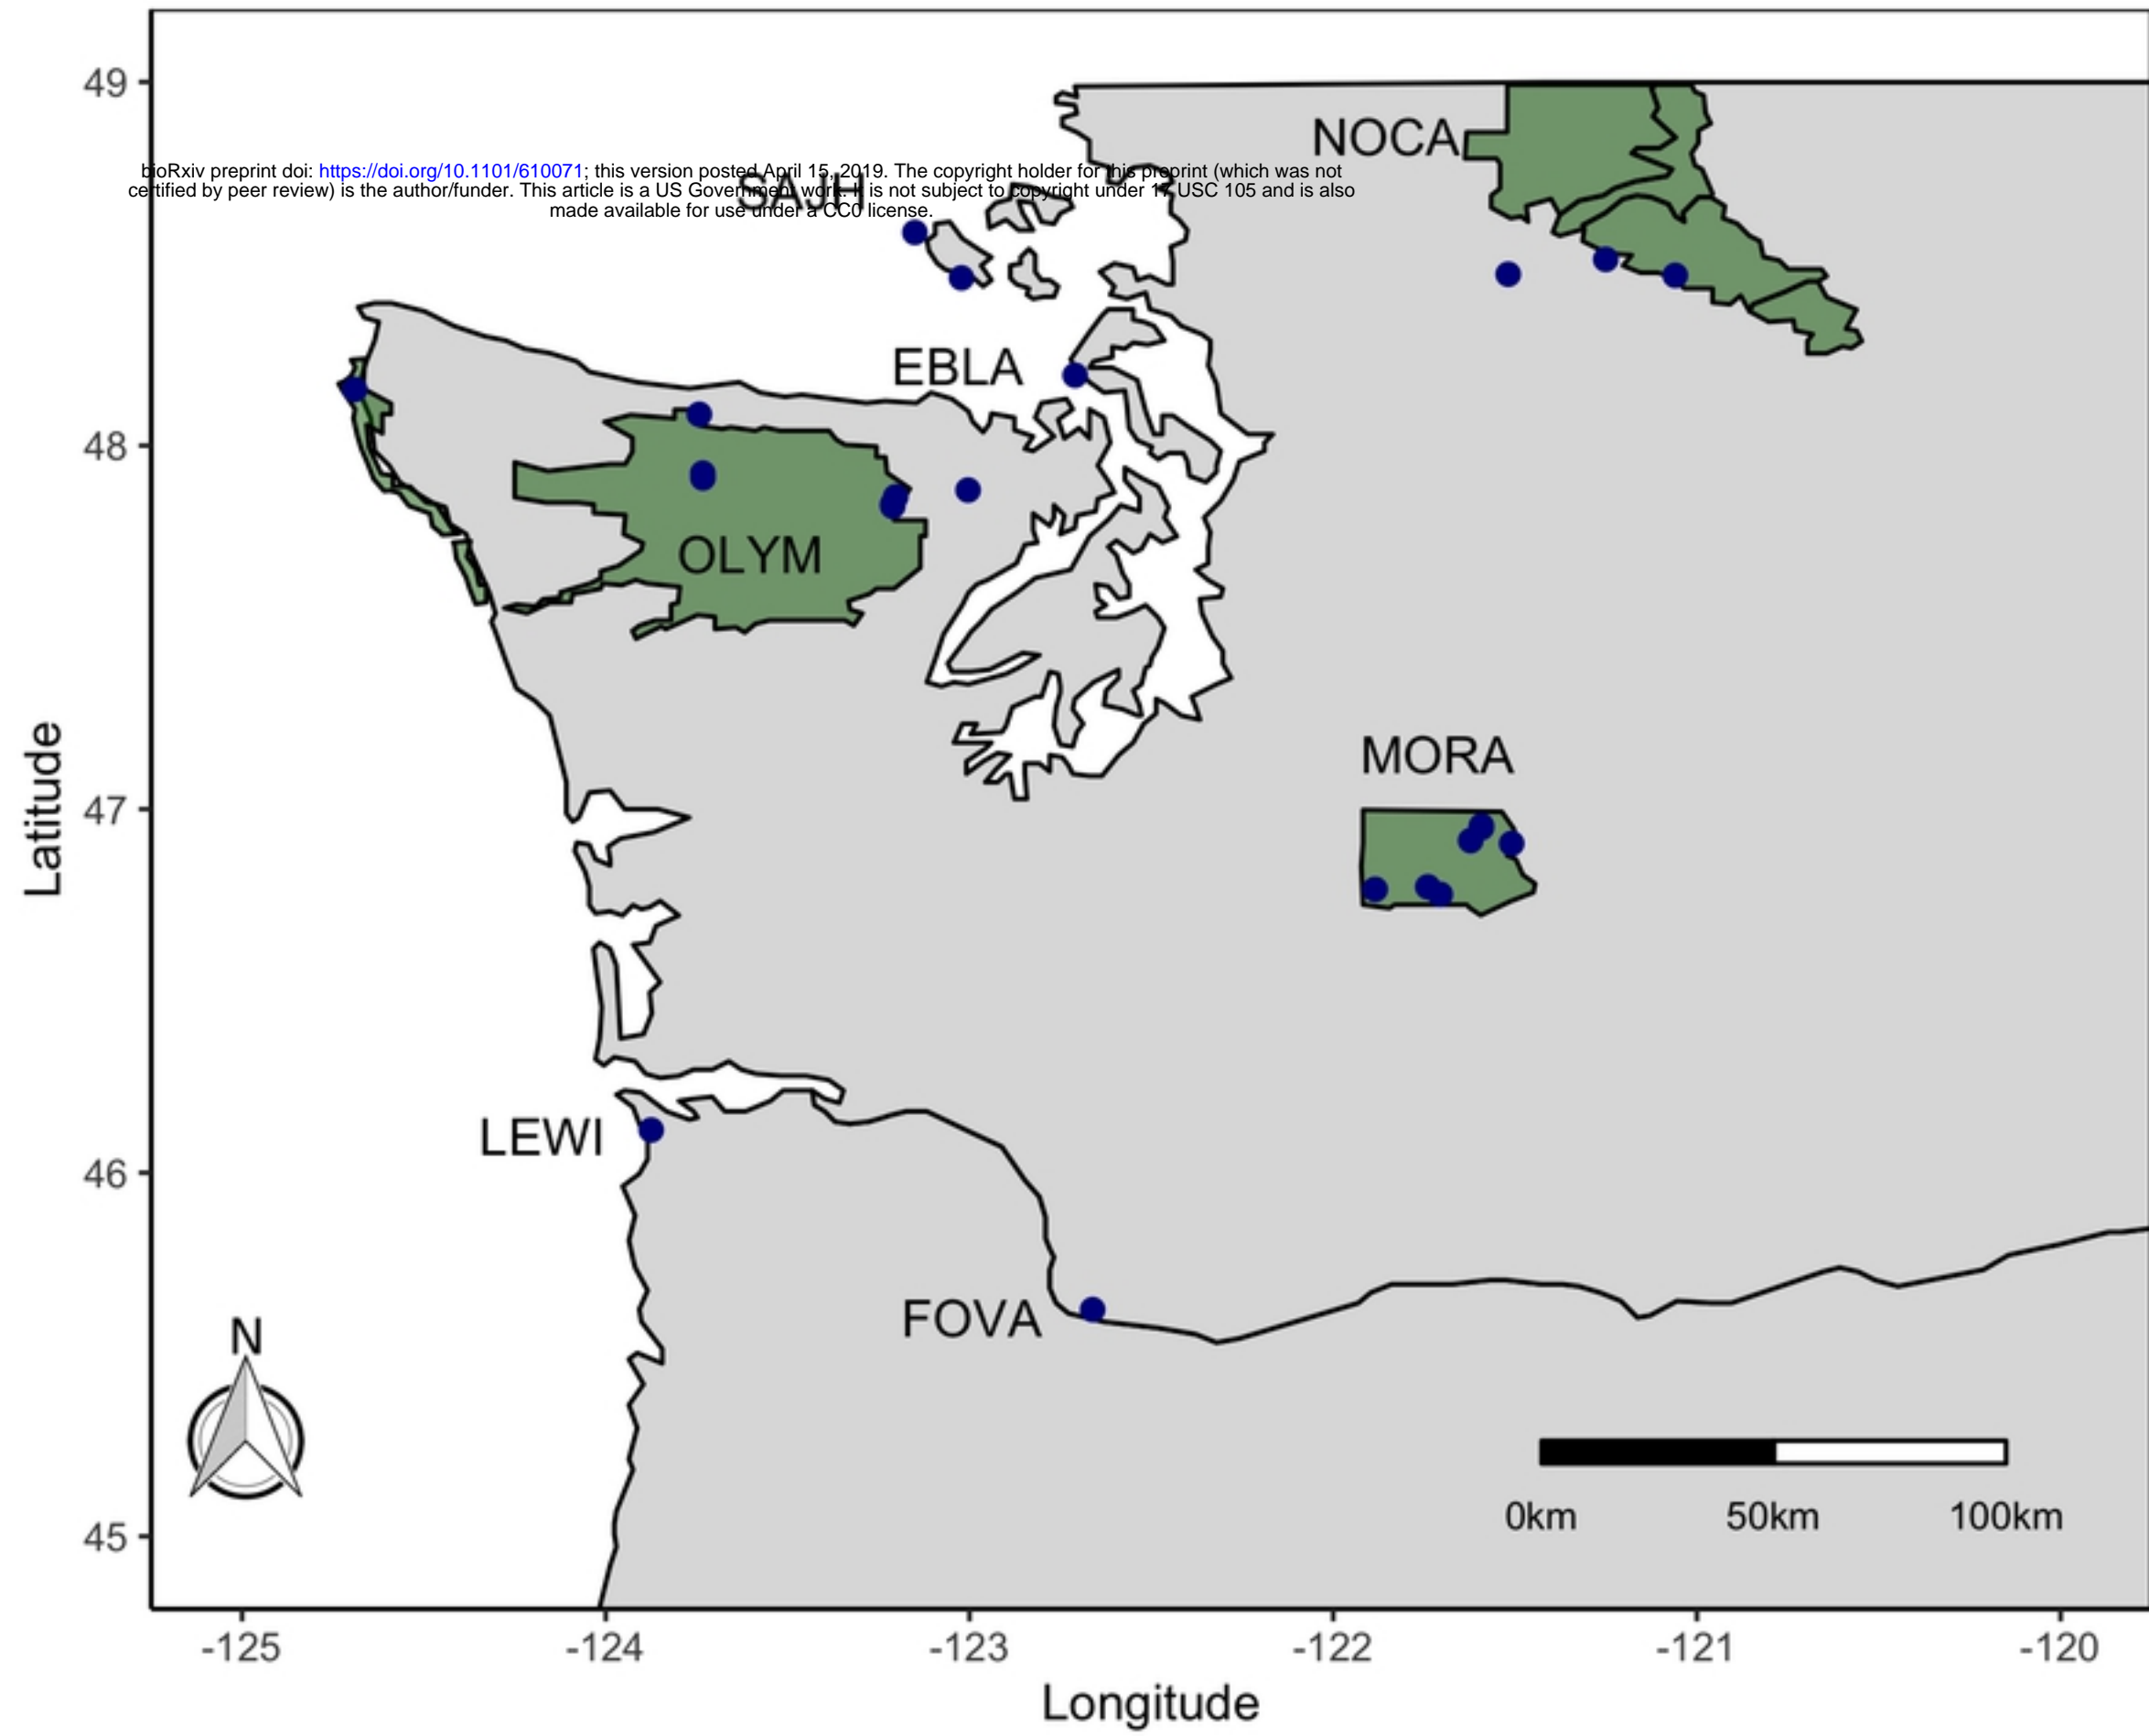

Fig1

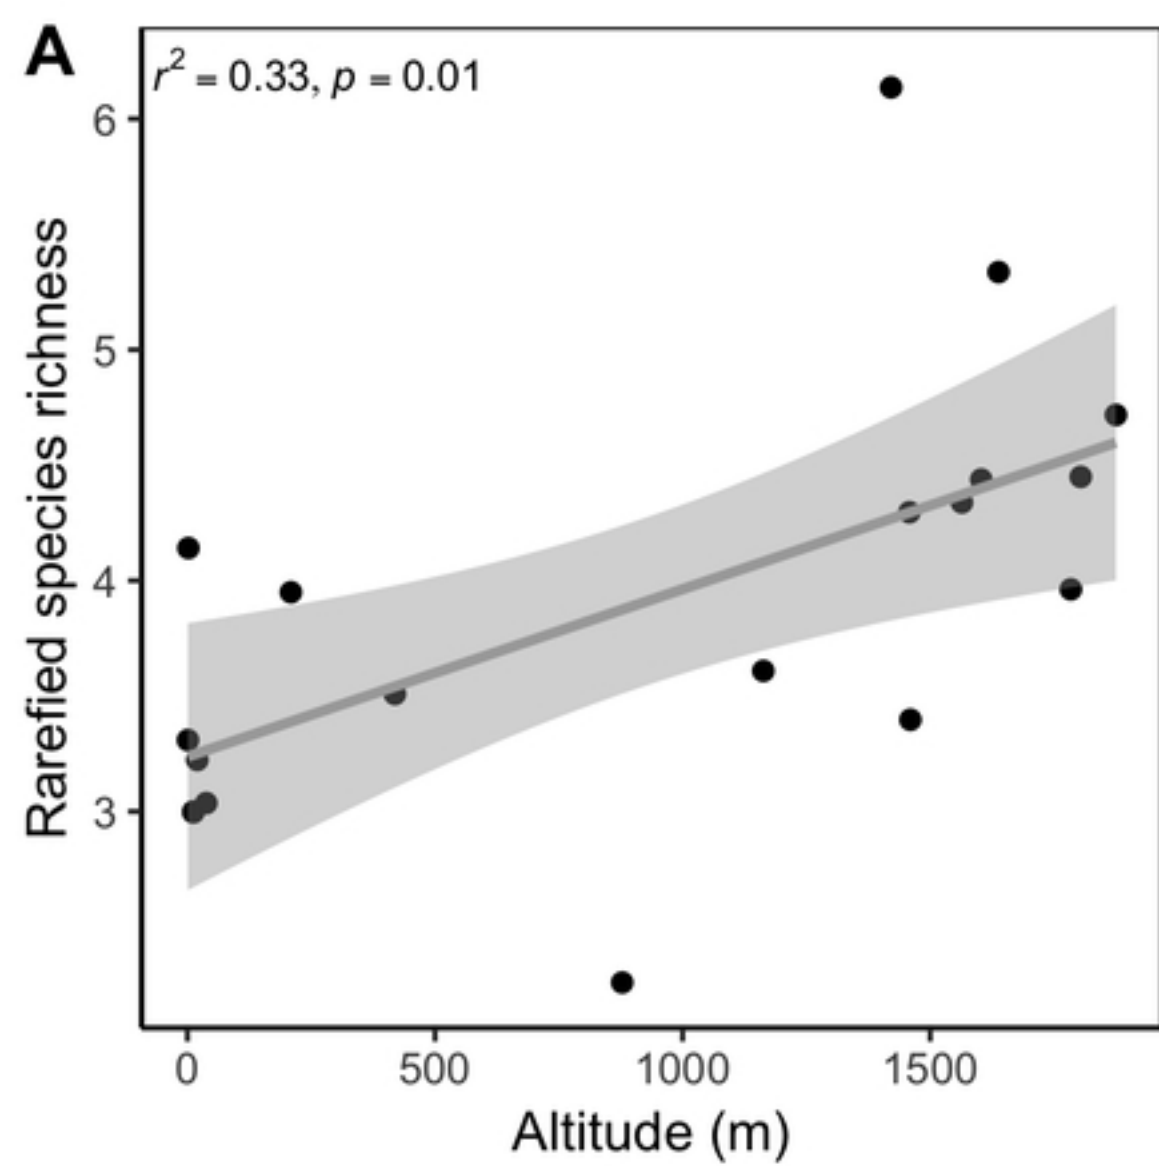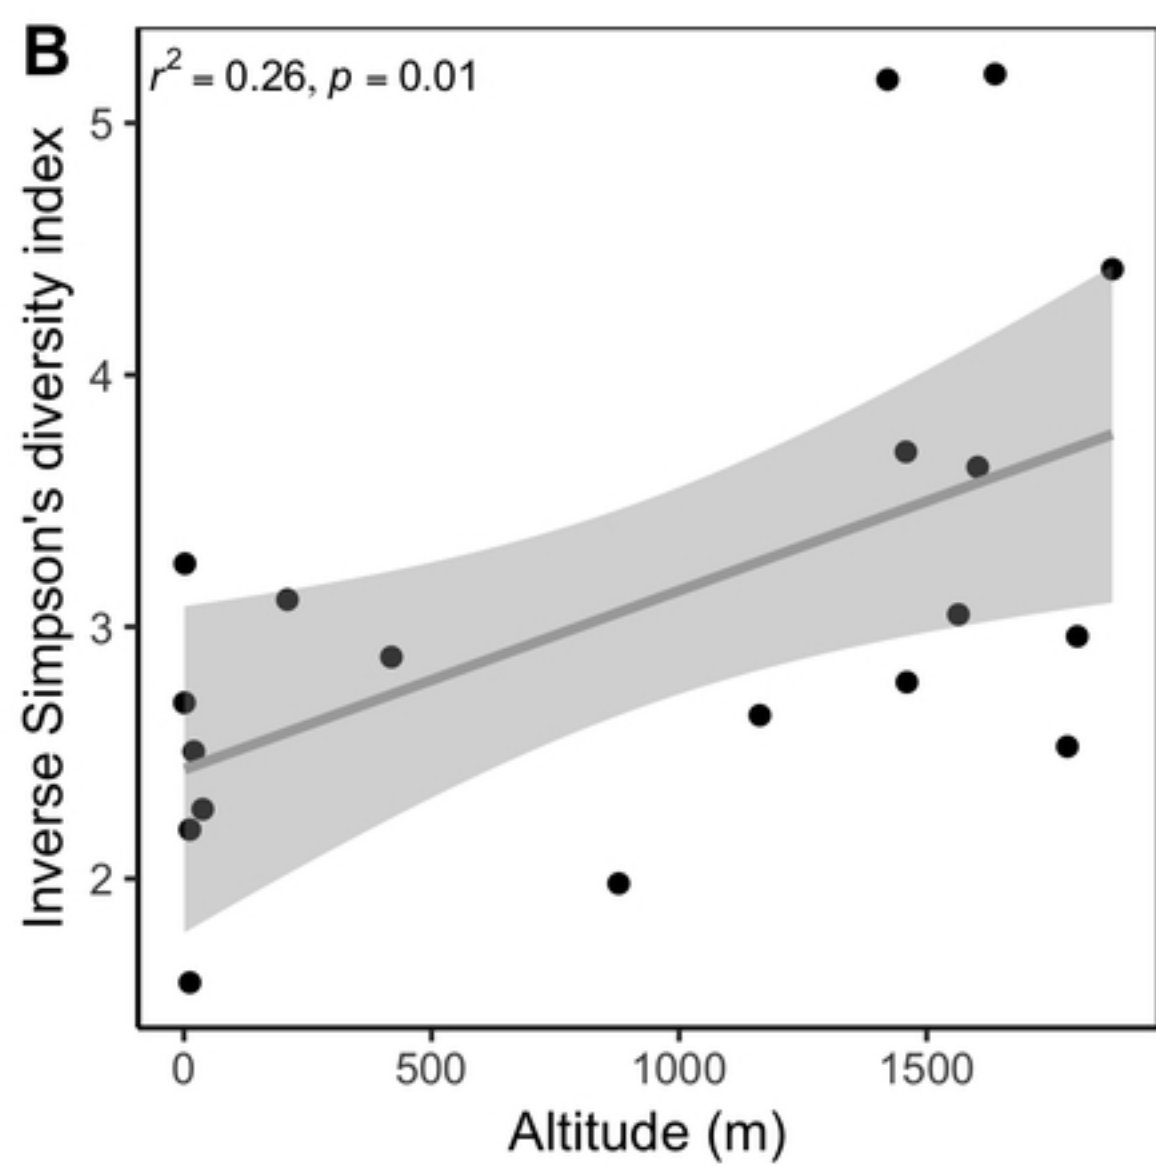

Fig2

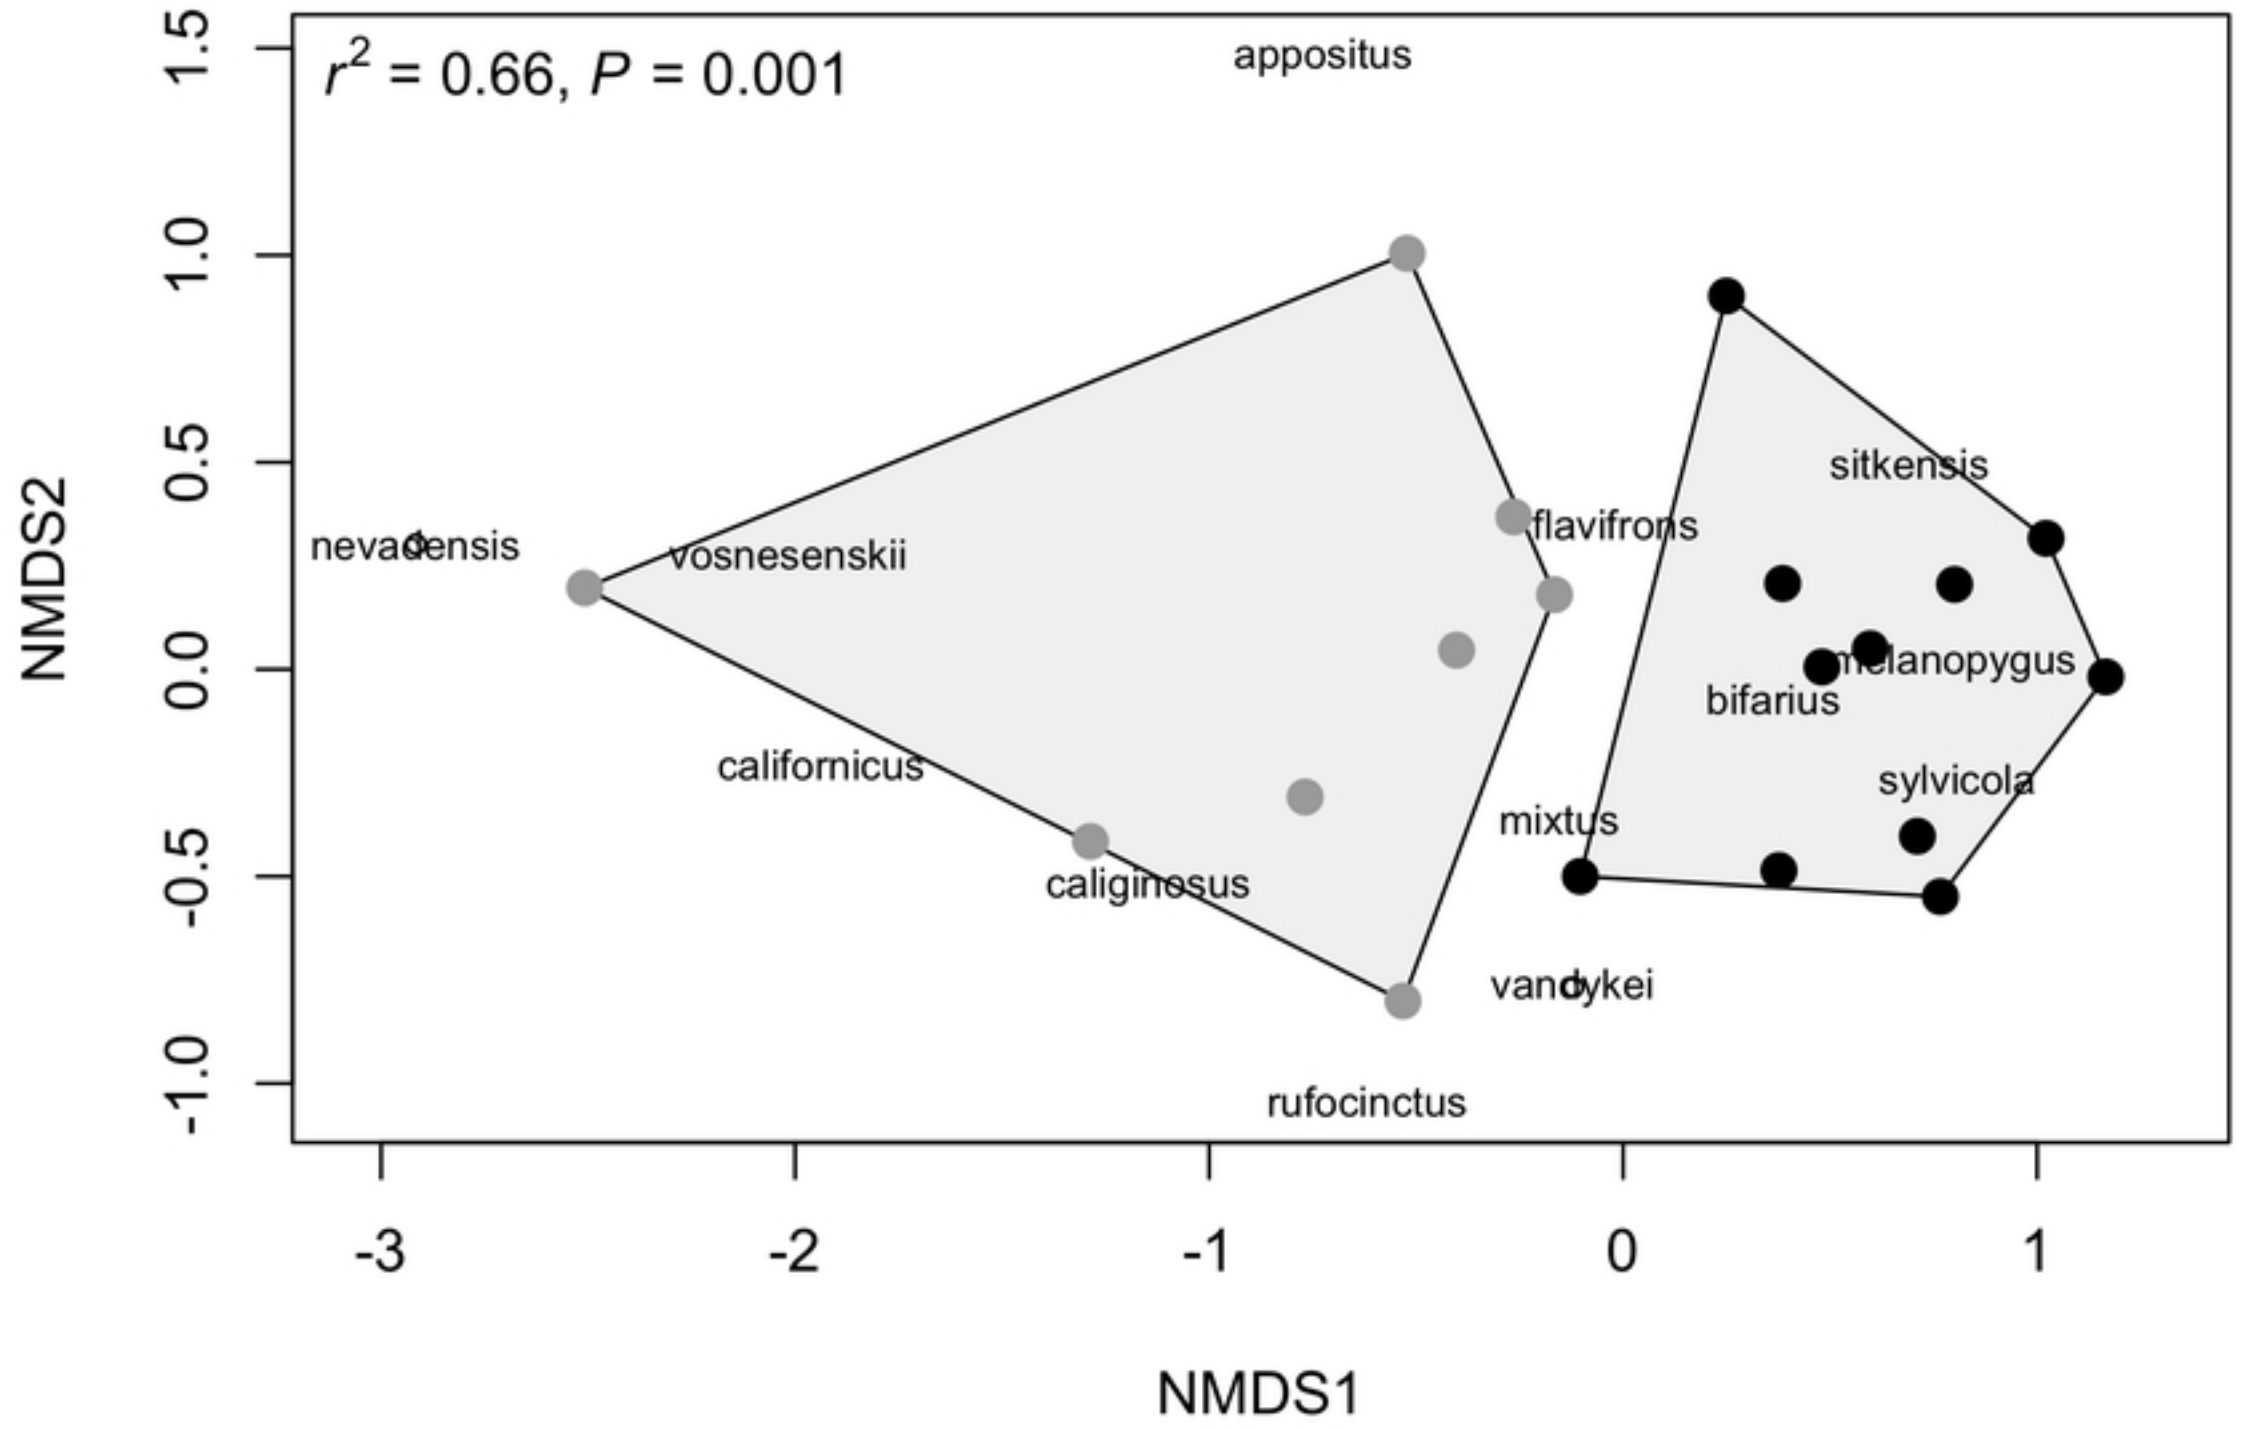

Fig3

bioRxiv preprint doi: <https://doi.org/10.1101/610071>; this version posted April 15, 2019. The copyright holder for this preprint (which was not certified by peer review) is the author/funder. This article is a US Government work. It is not subject to copyright under 17 USC 105 and is also made available for use under a CC0 license.

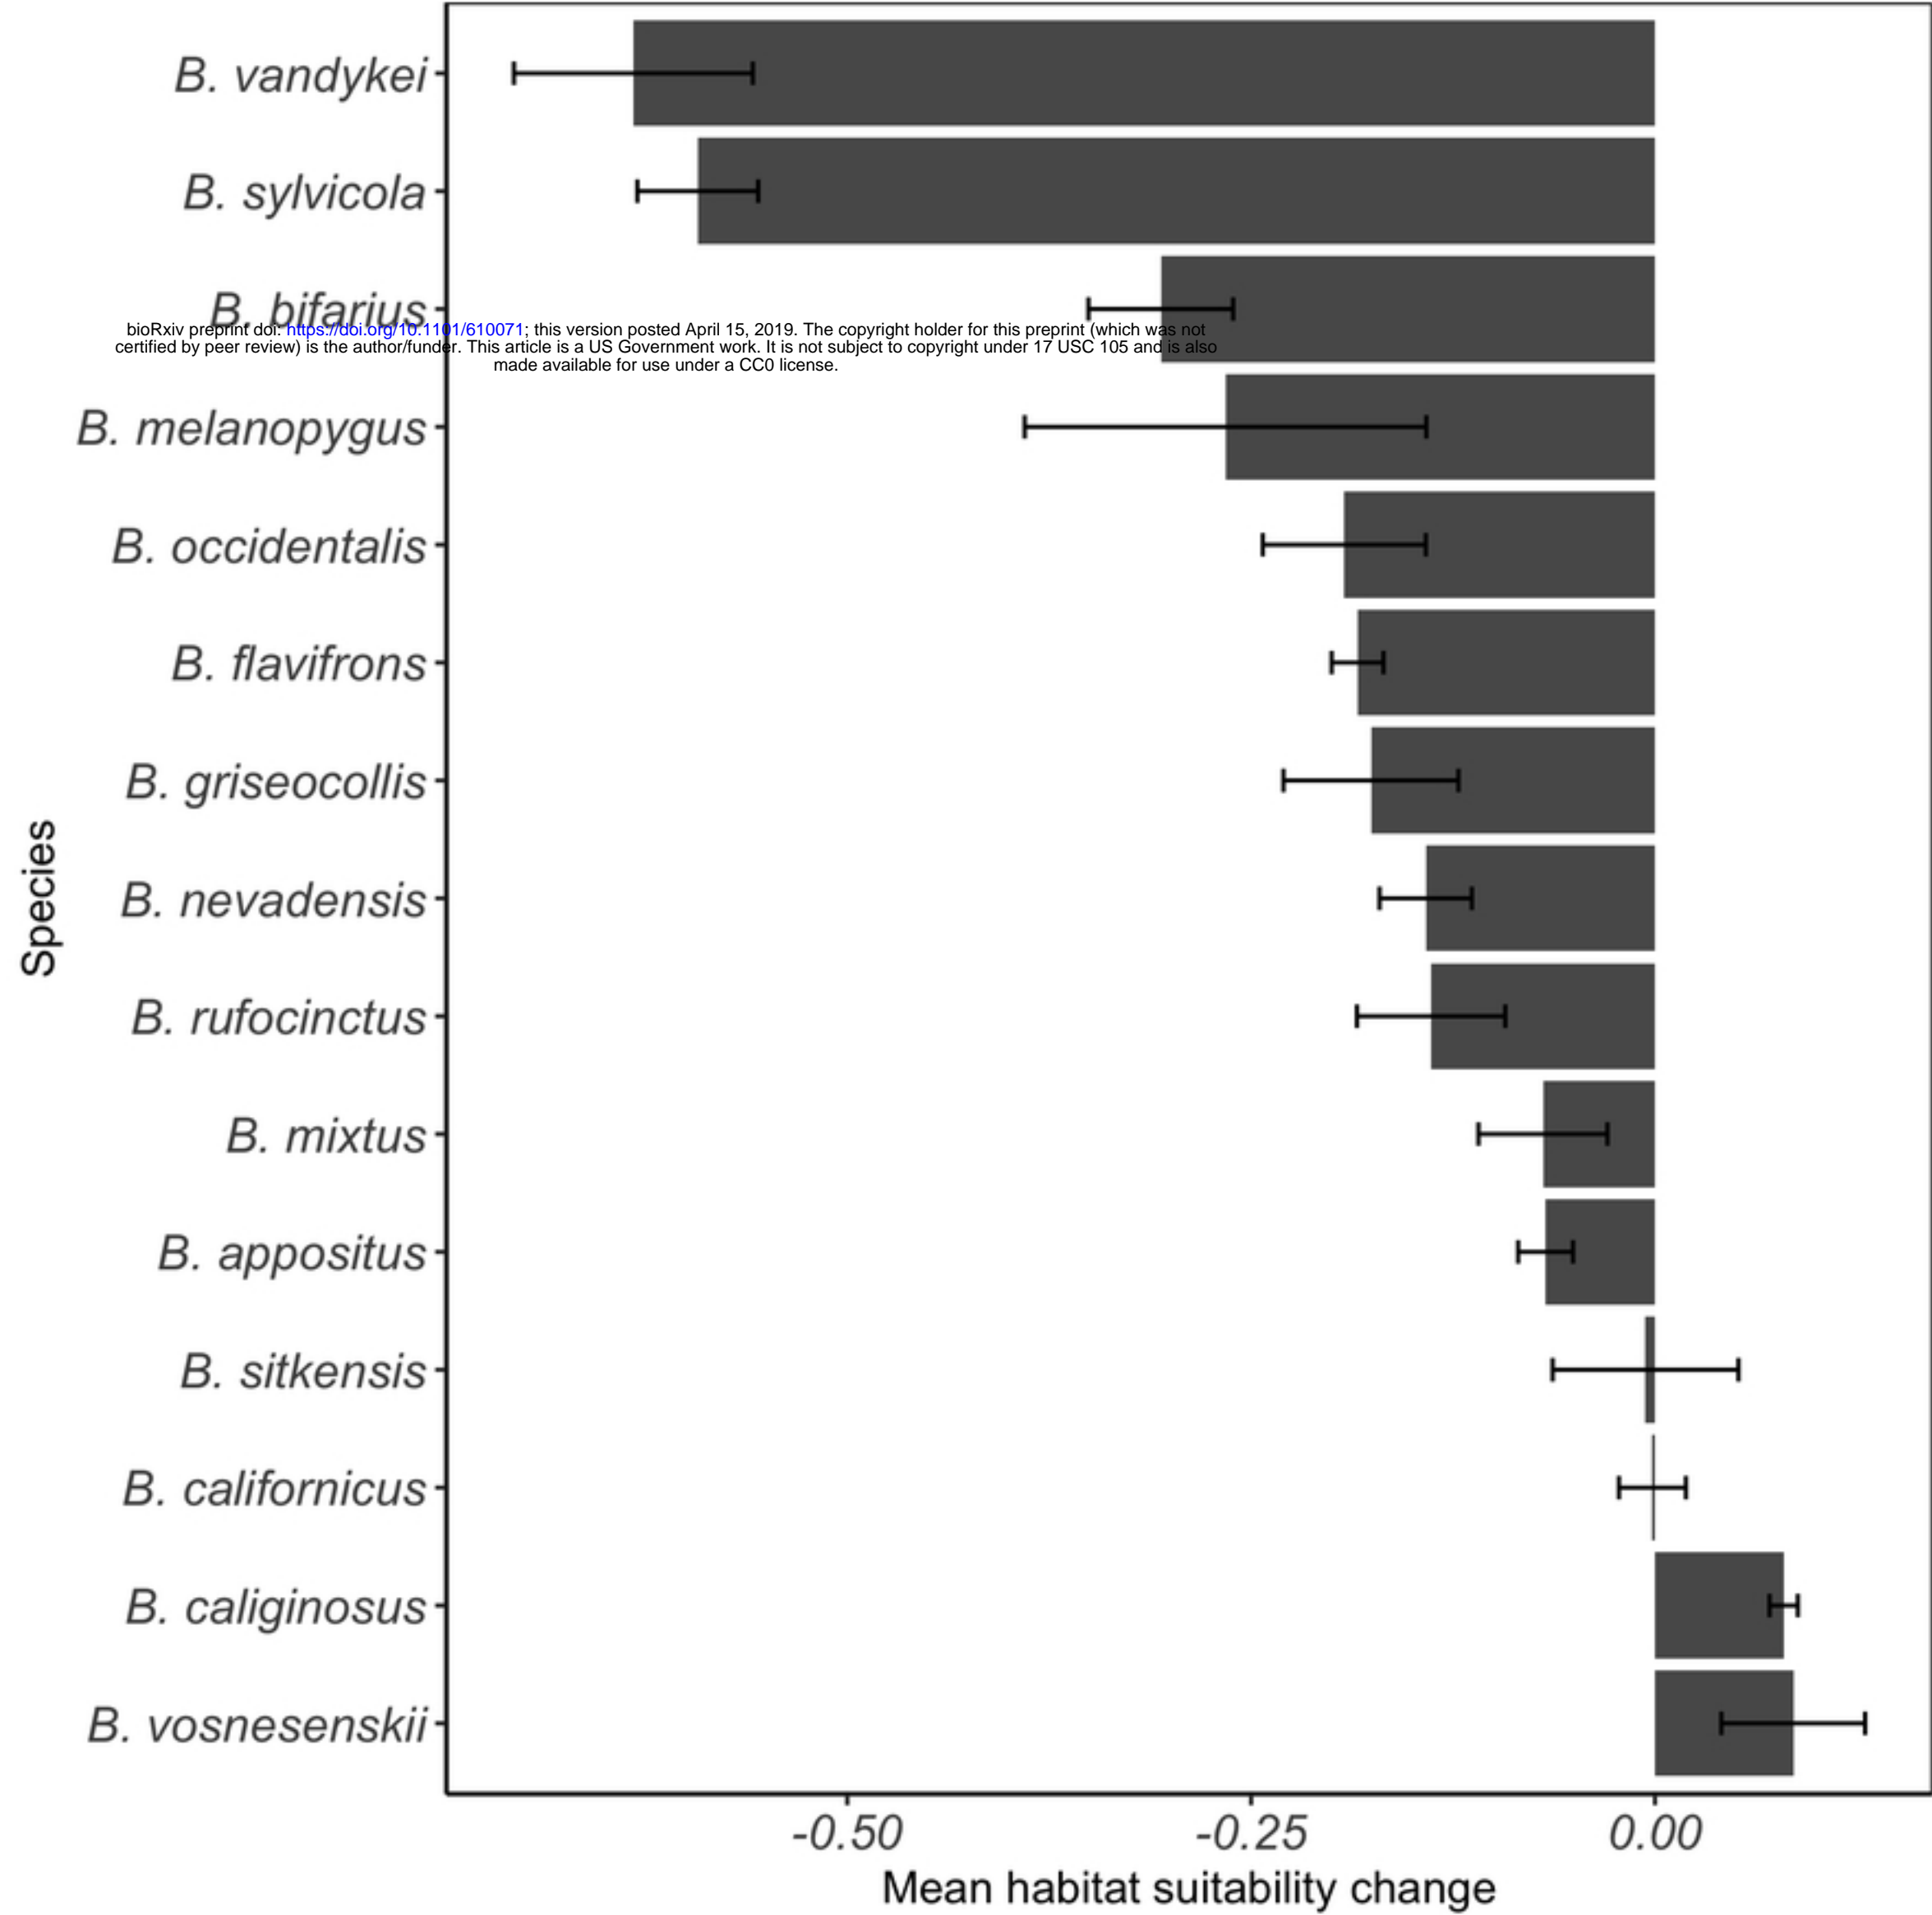

Fig5

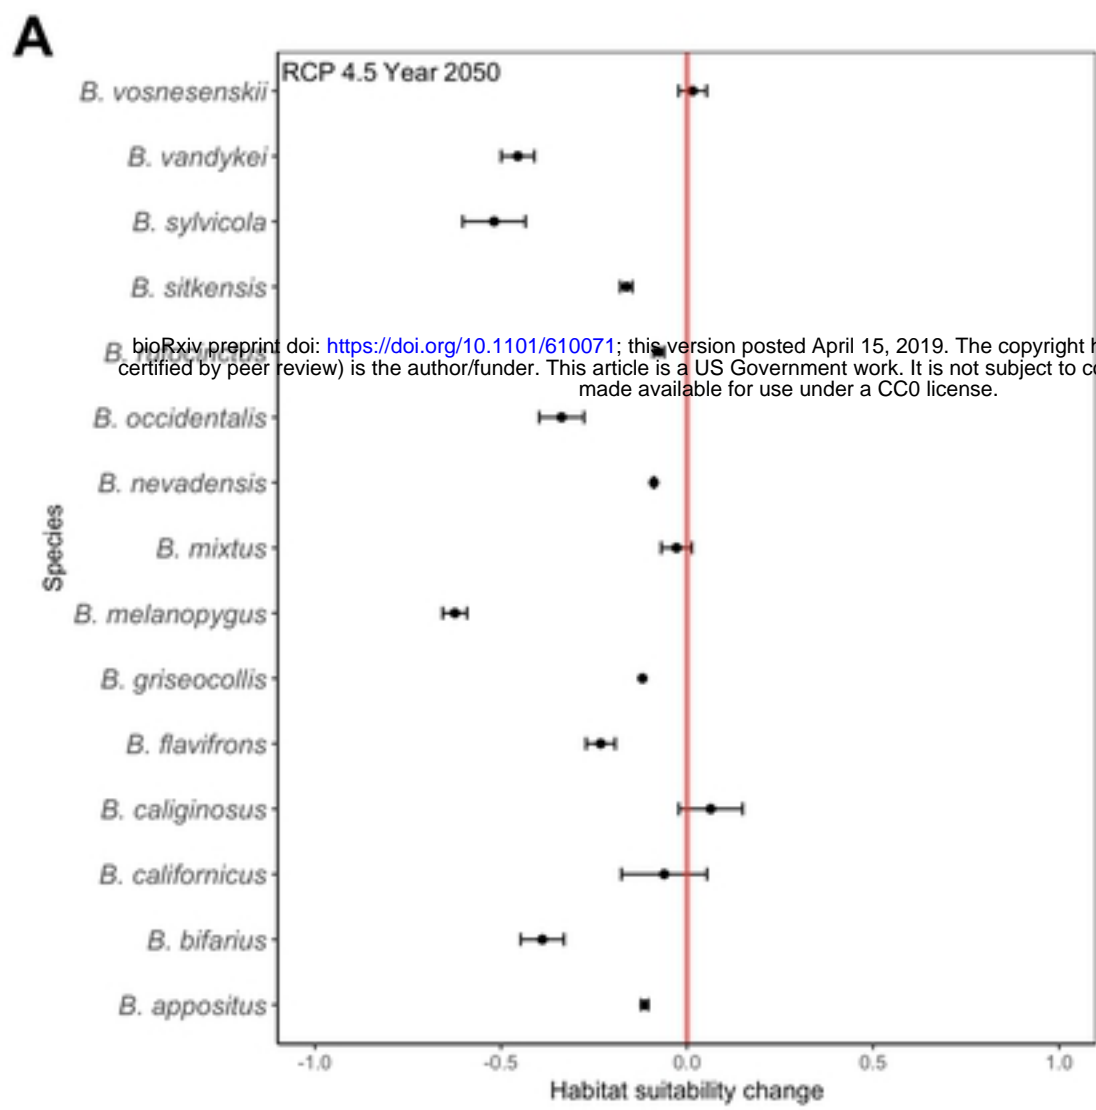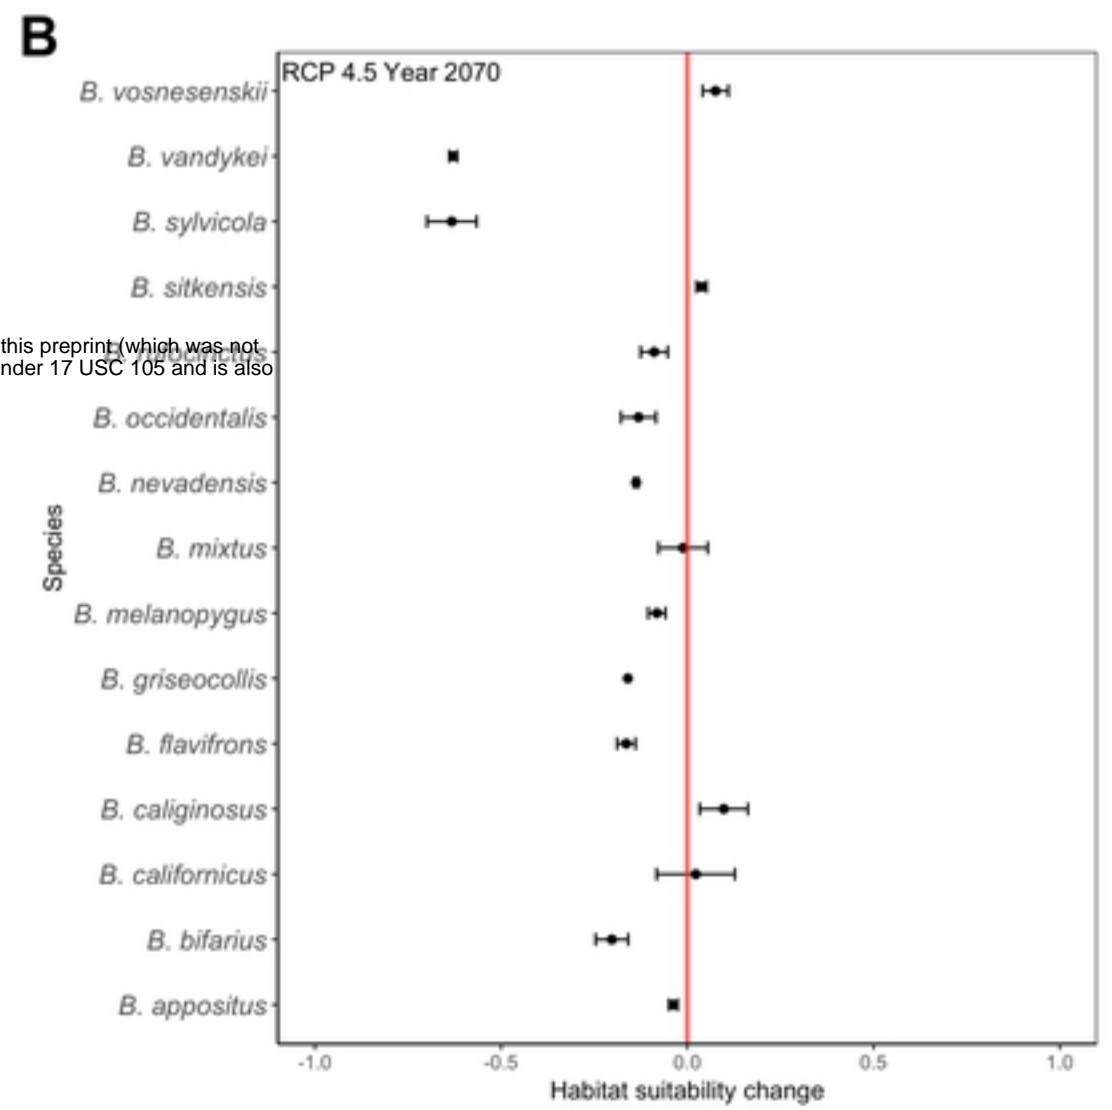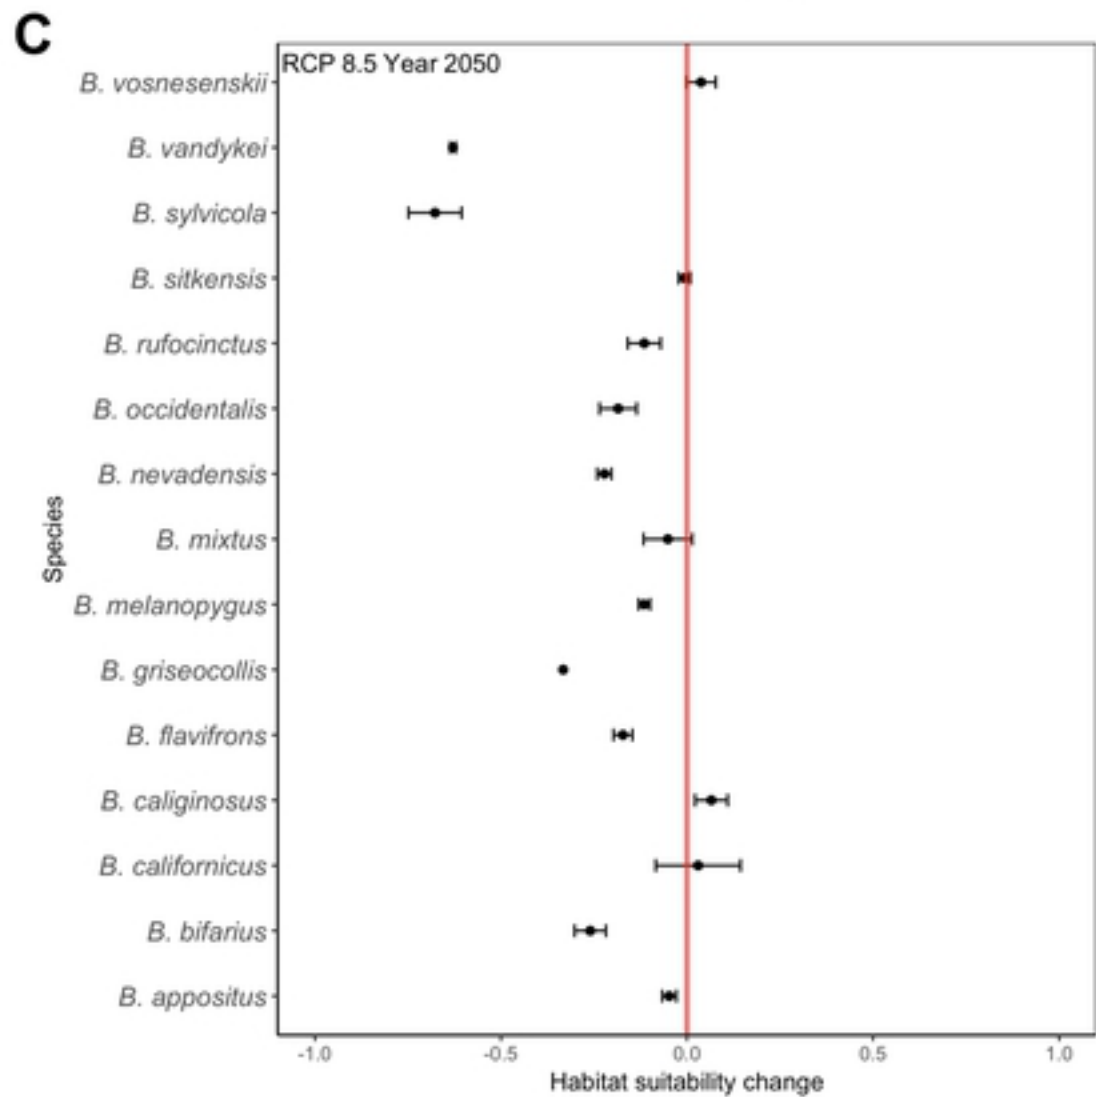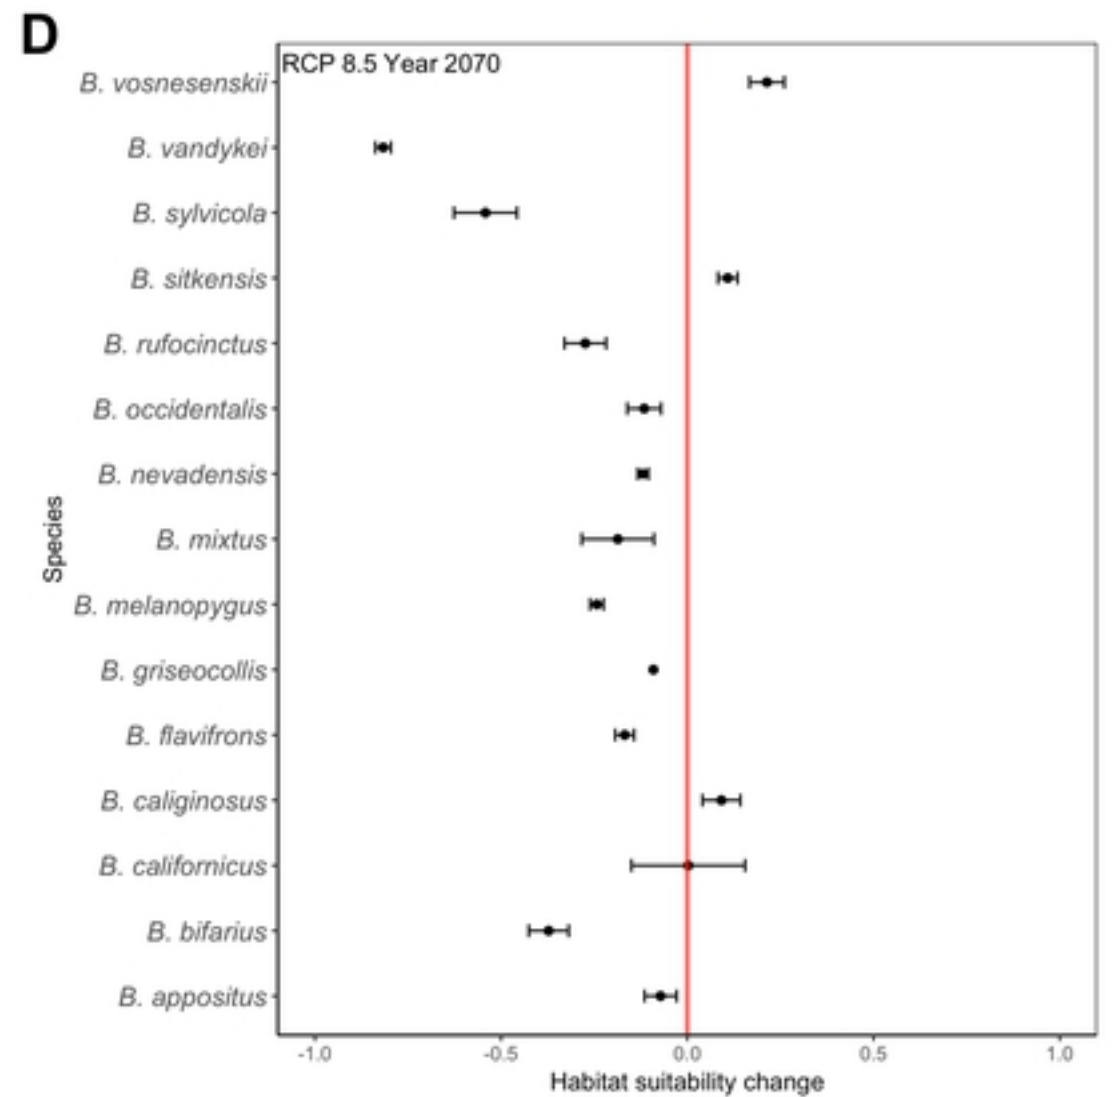

Fig4
